# Supplementary material
Source: publisher figshare collection journal article supplement (https://diabetesjournals.figshare.com/articles/dataset/_/14448480)

## **Supplementary Data Table of Contents**

**Supplementary Table 1.** Characteristics of Included Genome-Wide Association Studies.

*Supplementary Tables 2-8, 10, 11 in Excel Spreadsheet.*

**Supplementary Table 2.** Supplementary Table 2. Association between T2D and Heart Failure using variants from the DIAMANTE GWAS (Vujkovic et al. Nat Genet 2020)

**Supplementary Table 3.** Association between T2D and Heart Failure using variants from the DIAGRAM GWAS (Mahajan et al. Nat Genet 2018)

**Supplementary Table 4.** Association between Insulin Resistance and Heart Failure using variants from the MAGIC GWAS (Lotta et al. Nat Genet 2017) and estimates from Wang (Diabetes Care 2017)

**Supplementary Table 5.** Association between Fasting Insulin and Heart Failure

**Supplementary Table 6.** Association between Fasting Glucose and Heart Failure

**Supplementary Table 7.** Association between Glycated Hemoglobin and Heart Failure

**Supplementary Table 8.** Association between Heart Failure and Type 2 Diabetes

**Supplementary Table 9.** Baseline Characteristics of GoDARTS Patients.

**Supplementary Table 10.** Leave-one-out MR analysis of association between T2D and HF using DIAMANTE variants.

**Supplementary Table 11.** Full Multivariable MR Results for Association of Traits with Incident HF.

**Supplementary Figure 1.** Example Power Calculations for Genetic Instruments Reflecting a Range of Different Exposure Phenotypes and their associations with HF.

**Supplementary Figure 2.** MR Plot of Single Nucleotide Variants Associated with Type 2 Diabetes and their Association with Heart Failure.

**Supplementary Figure 3.** MR Plot of Single Nucleotide Variants Associated with Insulin Resistance and their Association with Heart Failure.

**Supplementary Figure 4.** MR Plot of Single Nucleotide Variants Associated with Heart Failure and their Association with Type 2 Diabetes.

Supplementary Table 1. Characteristics of Included Genome-Wide Association Studies.

| Trait                               | Consortium and Data Download Web Address                                                                                                                                                                                                                                            | Author                  | Number of individuals                         | Estimate of SNP-Based Heritability (where available) (%) | Quality Control                                                                                                                                                                                                                                                                                                                            |
|-------------------------------------|-------------------------------------------------------------------------------------------------------------------------------------------------------------------------------------------------------------------------------------------------------------------------------------|-------------------------|-----------------------------------------------|----------------------------------------------------------|--------------------------------------------------------------------------------------------------------------------------------------------------------------------------------------------------------------------------------------------------------------------------------------------------------------------------------------------|
| Type 2 Diabetes                     | DIAMANTE dbGaP - <a href="https://www.ncbi.nlm.nih.gov/gap/advanced_search/?TERM=phs001672.v3.p1">https://www.ncbi.nlm.nih.gov/gap/advanced_search/?TERM=phs001672.v3.p1</a><br>(data not available at time of writing but link identified in manuscript)                           | Vujkovic 2020           | 228,499 type 2 diabetes/1,178,783 controls    | 19                                                       | HWE $< 1 \times 10^{-10}$ , call rate $> 0.975$ , MAD $> 0.1\%$ (European), $> 1\%$ (African American, Hispanic, Asian)                                                                                                                                                                                                                    |
| Type 2 Diabetes                     | DIAGRAM <a href="https://diagram-consortium.org/downloads.html">https://diagram-consortium.org/downloads.html</a> ; <a href="https://cnsgenomics.com/content/data">https://cnsgenomics.com/content/data</a>                                                                         | Mahajan 2018            | 74,124 type 2 diabetes cases/824,006 controls | 18                                                       | DIAGRAM: Call rate $\geq 90\%$ ; HWE p value $< 1 \times 10^{-6}$ , MAF $\geq 1\%$<br>UK Biobank data: excluded SNPs with minor allele count $< 5\%$ , Hardy-Weinberg equilibrium test p value $< 1 \times 10^{-6}$ , missing genotype rate $> 0.05$ , or imputation info score $< 0.3$ .                                                  |
| Insulin Resistance                  | Fasting Insulin: MAGIC <a href="https://www.magicinvestigators.org/downloads/">https://www.magicinvestigators.org/downloads/</a><br>Triglycerides/HDL-cholesterol: GLGC <a href="http://lipidgenetics.org/#data-downloads-title">http://lipidgenetics.org/#data-downloads-title</a> | Lotta 2017<br>Wang 2017 | 451,193                                       | n/a                                                      | SNPs excluded if:<br>MAF $< 1\%$ ; Hardy-Weinberg equilibrium p $< 1 \times 10^{-6}$ ; call rate $< 99\%$ ; showed differential missingness between cases and controls with p $< 1 \times 10^{-6}$ ; differential genotyping between the CoreExome-24v1.0 and CoreExome-12v1.0 chips in a subset of 96 samples genotyped using both chips. |
| Fasting Glucose and Fasting Insulin | MAGIC <a href="https://www.magicinvestigators.org/downloads/">https://www.magicinvestigators.org/downloads/</a>                                                                                                                                                                     | Scott 2012              | 133,010 (FG)                                  | FG – 4.8<br>FI – 1.2                                     | Call rate 95% and minor allele frequency (MAF) $\geq 1\%$ .                                                                                                                                                                                                                                                                                |

|                         |                                                                                                                                                                                                                  |                                                     |                               |      |                                                                                                                                                                                                                                                                                                                                                                             |
|-------------------------|------------------------------------------------------------------------------------------------------------------------------------------------------------------------------------------------------------------|-----------------------------------------------------|-------------------------------|------|-----------------------------------------------------------------------------------------------------------------------------------------------------------------------------------------------------------------------------------------------------------------------------------------------------------------------------------------------------------------------------|
|                         |                                                                                                                                                                                                                  |                                                     | 108,557 (FI)                  |      | Removed occurrences of sex discrepancies, ancestry outliers, heterozygosity, Hardy-Weinberg equilibrium $p < 1 \times 10^{-4}$ , SNP effect estimate standard error $\geq 10$ and SNP minor allele count $< 10$ .                                                                                                                                                           |
| Glycated Haemoglobin    | MAGIC<br><a href="https://www.magicinvestigators.org/downloads/">https://www.magicinvestigators.org/downloads/</a>                                                                                               | Wheeler 2017                                        | 159,940                       | 4-14 | Cohorts were advised to keep SNPs with Hardy-Weinberg-disequilibrium $p$ -value $\geq 1 \times 10^{-6}$ , SNP genotyping call rate $\geq 95\%$ and minor allele frequency (MAF) $\geq 1\%$                                                                                                                                                                                  |
| Heart Failure           | HERMES<br><a href="https://www.hermesconsortium.org/">https://www.hermesconsortium.org/</a>                                                                                                                      | Shah 2020                                           | 47,309 cases/930,014 controls | 8.8  | Variants removed if imputation quality $< 0.5$ , MAF $< 1\%$ , absolute betas and s.e. $> 10$ . More stringent QC measures applied to studies where genotyping of cases and controls was performed on different platforms.                                                                                                                                                  |
| Coronary Heart Disease  | CARDIOGRAMplusC4D<br><a href="http://www.cardiogramplusc4d.org/data-downloads/">http://www.cardiogramplusc4d.org/data-downloads/</a>                                                                             | Nelson 2017                                         | 10,801 cases/137,914 controls | 10.6 | Call rate $\geq 90\%$ ; HWE $p > 1 \times 10^{-9}$ ; ethnic outliers                                                                                                                                                                                                                                                                                                        |
| LDL-Cholesterol         | GLGC<br><a href="http://lipidgenetics.org/#data-downloads-title">http://lipidgenetics.org/#data-downloads-title</a>                                                                                              | Willer 2013                                         | 188,578                       | 14.6 | Average standard errors for association statistics from each study were plotted against study sample size to identify outlier studies.<br><br>Allele frequencies inspected for strand orientation.<br><br>Genomic control values for study specific analyses were inspected, and all were $< 1.20$ . Variants for which the minor allele was observed $< 7$ times excluded. |
| Body Mass Index         | GIANT<br><a href="https://portals.broadinstitute.org/collaboration/giant/index.php/GIANT_consortium_data_files">https://portals.broadinstitute.org/collaboration/giant/index.php/GIANT_consortium_data_files</a> | Locke 2015                                          | 339,224                       | 2.7  | Predominantly call rate $\geq 90\%$ ; HWE $p > 1 \times 10^{-4}$ ; MAF $> 1\%$                                                                                                                                                                                                                                                                                              |
| Systolic Blood Pressure | International Consortium of Blood Pressure Genome Wide Association Studies (ICBP)                                                                                                                                | Evangelou 2018 (also included data from UK BIOBANK) | 1,006,863                     | 5.7  | MAF $> 1\%$ ; HWE $p > 1 \times 10^{-6}$ ; missingness $< 0.015$ , imputation quality INFO $> 0.1$                                                                                                                                                                                                                                                                          |

|  |                                                                                                           |  |  |  |  |
|--|-----------------------------------------------------------------------------------------------------------|--|--|--|--|
|  | <a href="https://www.ebi.ac.uk/gwas/studies/GCST006624">https://www.ebi.ac.uk/gwas/studies/GCST006624</a> |  |  |  |  |
|--|-----------------------------------------------------------------------------------------------------------|--|--|--|--|

Supplementary Table 2. Baseline Characteristics of GoDARTS Patients.

|                                      | Type 2 Diabetes<br>(n=8,329) | No Type 2 Diabetes<br>(n=4,590) | p value<br>between groups |
|--------------------------------------|------------------------------|---------------------------------|---------------------------|
| Age at recruitment (years)           | 65 ± 12                      | 60 ± 12                         | <0.001                    |
| Male (%)                             | 4267 (53.5)                  | 2386 (52.0)                     | <0.001                    |
| Prior MI (%)                         | 885 (11.1)                   | 267 (5.8)                       | <0.001                    |
| Systolic BP (mmHg)                   | 144 ± 4                      | 143 ± 4                         | <0.001                    |
| Current/Past Smoker                  | 3,827 (46.0)                 | 455 (10.0)                      | <0.001                    |
| Body Mass Index (kg/m <sup>2</sup> ) | 30.9 ± 5.8                   | 29.9 ± 5.1                      | <0.001                    |
| Aspirin use                          | 4,111 (49.4)                 | 996 (21.7)                      | <0.001                    |
| Statin use                           | 5,212 (62.6)                 | 1,017 (22.2)                    | <0.001                    |
| Total cholesterol (mmol/l)           | 4.6 ± 0.6                    | 4.9 ± 0.7                       | <0.001                    |
| HDL cholesterol (mmol/l)             | 1.3 ± 0.3                    | 1.6 ± 0.4                       | <0.001                    |
| Serum creatinine (umol/l)            | 94 ± 30                      | 96 ± 21                         | 0.28                      |
| Glycated haemoglobin (%)             | 7.6 ± 1.3                    | 6.1 ± 0.7                       | <0.001                    |
| Glycated haemoglobin (mmol/mol)      | 60 ± 14                      | 43 ± 8                          | <0.001                    |

Supplementary Figure 1. Example Power Calculations for Genetic Instruments Reflecting a Range of Different Exposure Phenotypes and their associations with HF.

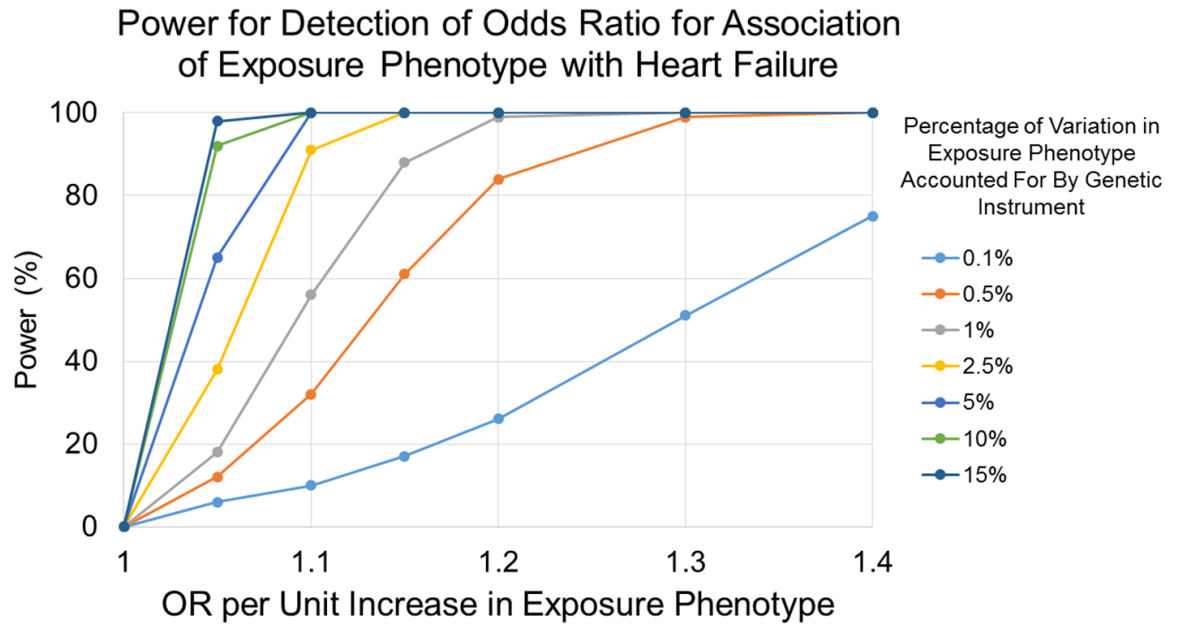

Supplementary Figure 2. MR Plot of Single Nucleotide Variants Associated with Type 2 Diabetes and their Association with Heart Failure.

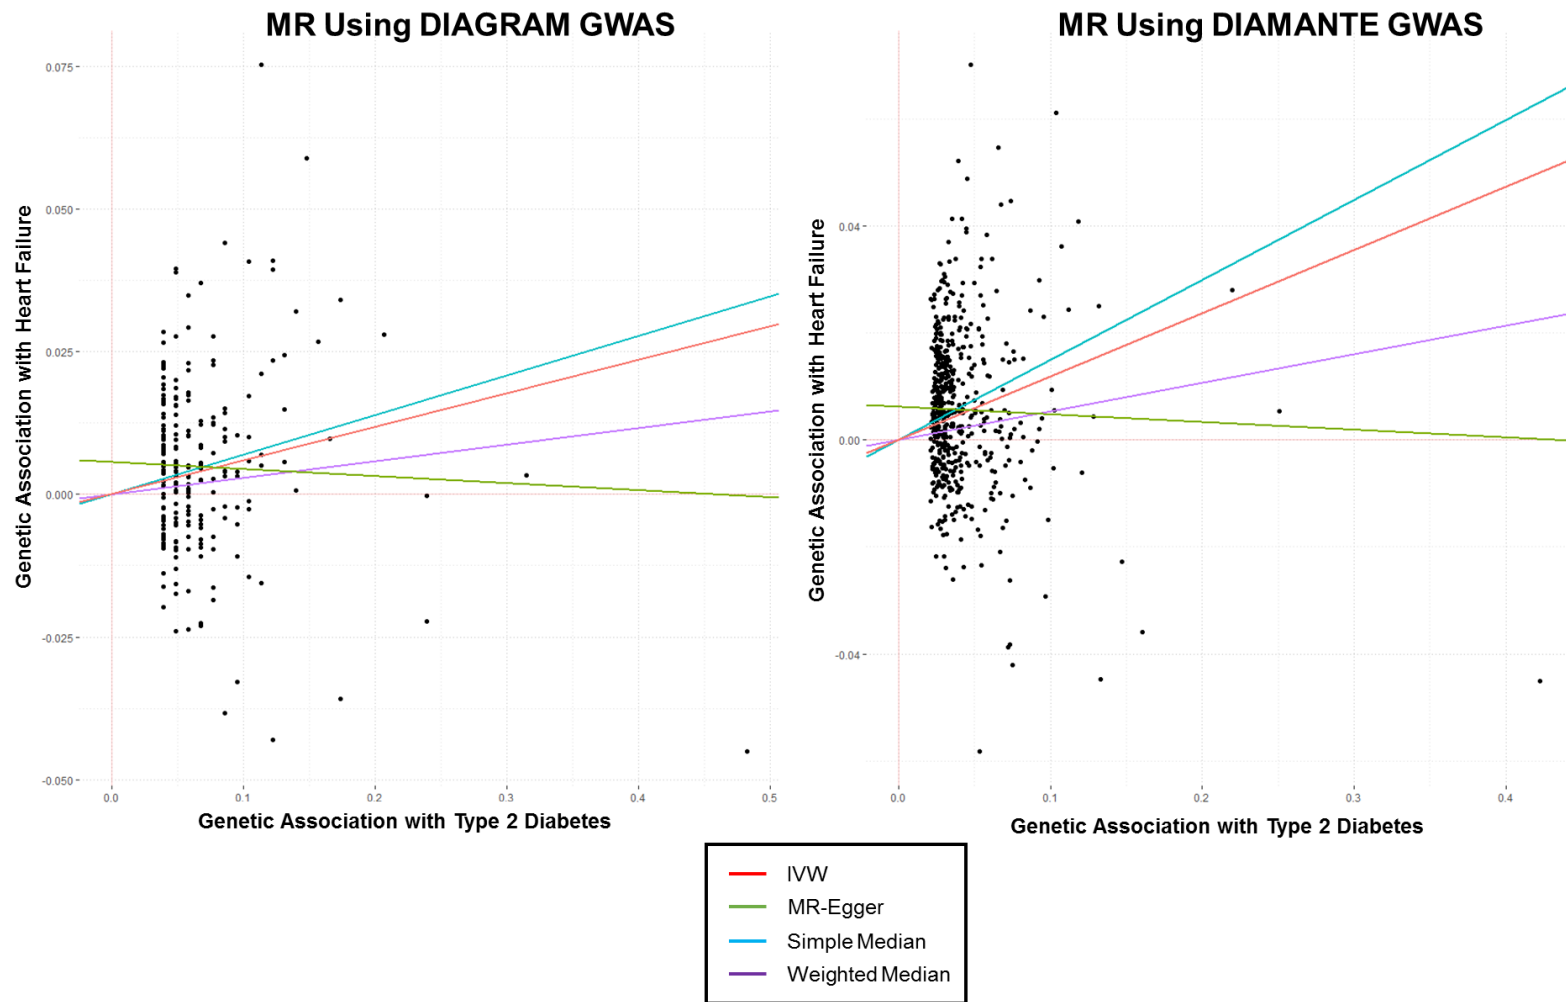

Supplementary Figure 3. MR Plot of Single Nucleotide Variants Associated with Insulin Resistance and their Association with Heart Failure.

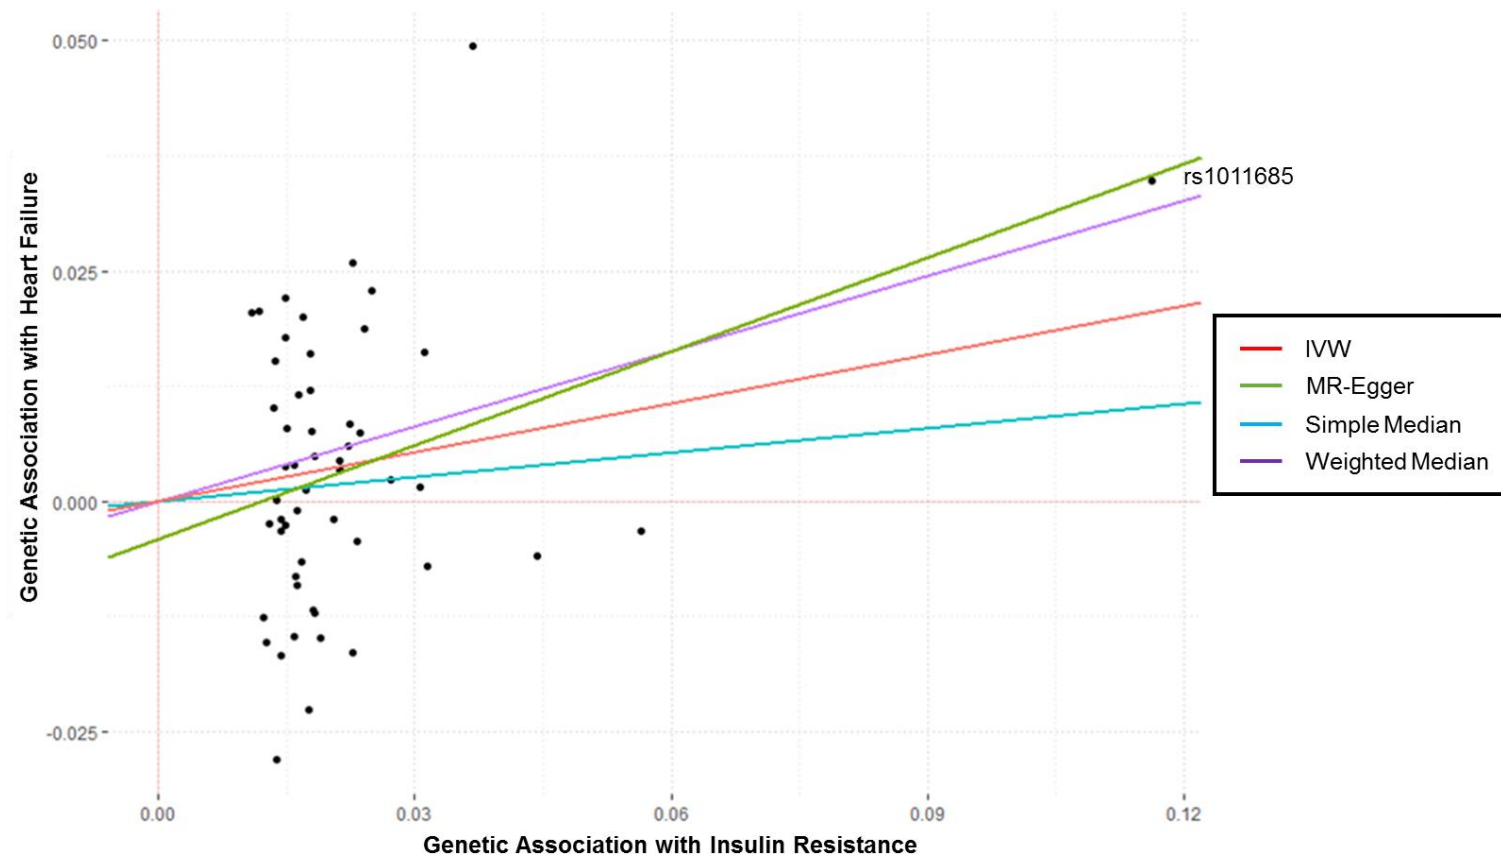

Supplementary Figure 4. MR Plot of Single Nucleotide Variants Associated with Heart Failure and their Association with Type 2 Diabetes.

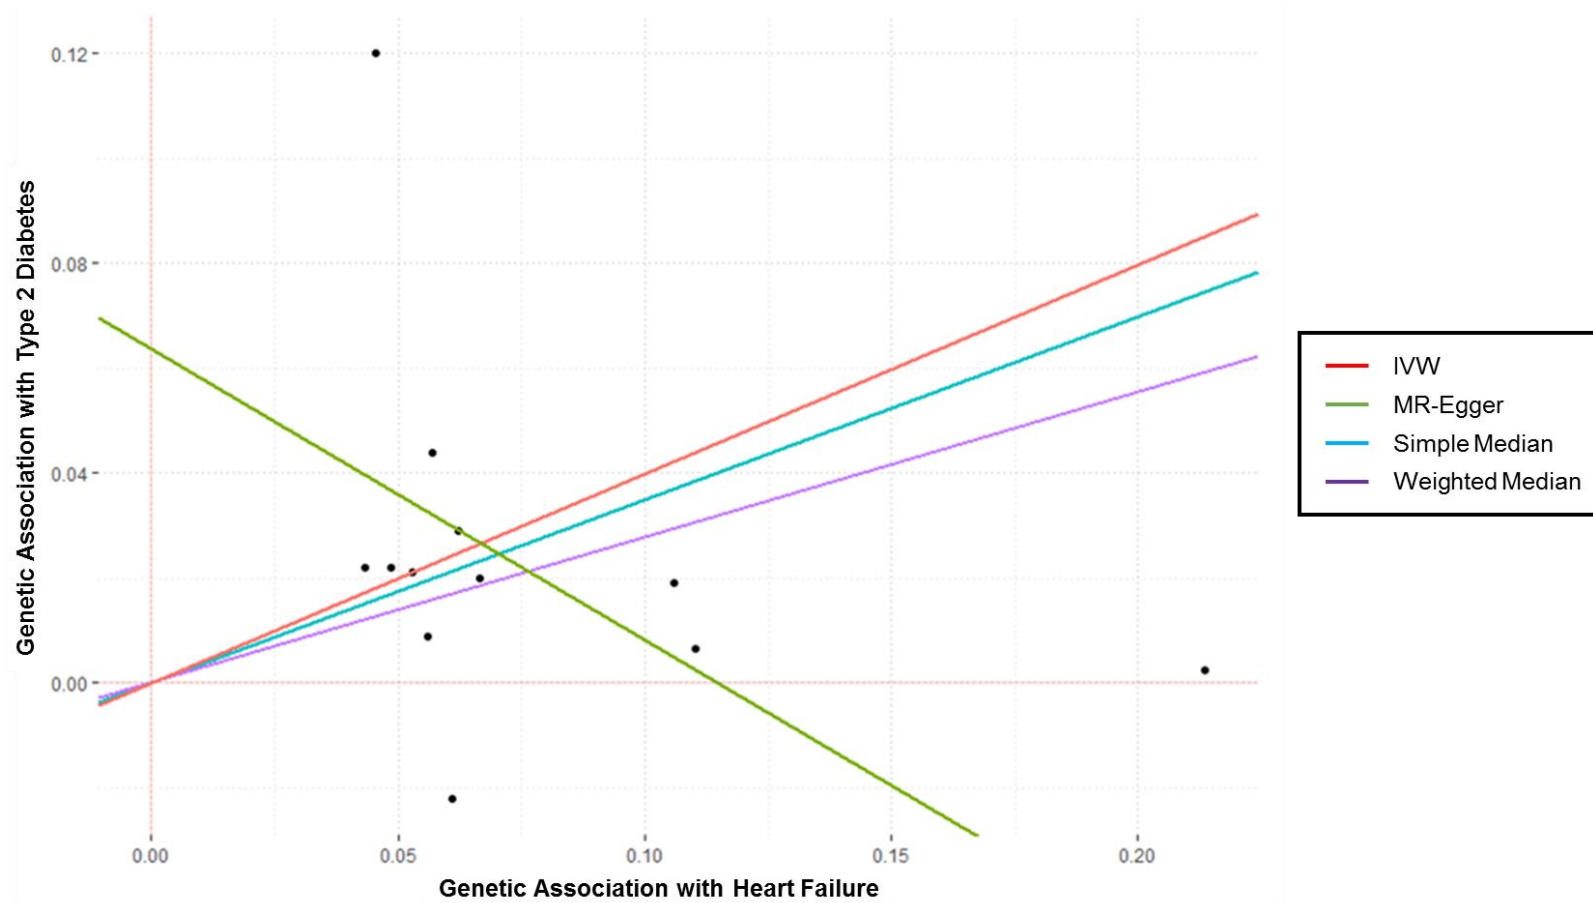

Supplement: Supplementary file 1 [file 1]
