# Supplementary material
Source: publisher figshare collection journal article supplement (https://diabetesjournals.figshare.com/articles/dataset/_/14448480)
Supplement: Supplementary file 1 [file 1]

## Sheet: Supplementary Table 3
Supplementary Table 3. Association between T2D and Heart Failure using variants from the DIAMANTE GWAS (Vujkovic et al. Nat Genet 2020)
SNP	effect_allele	other_allele	beta.t2d	se.t2d	pval.t2d	eaf.t2d	beta.hf	se.hf	eaf.hf	pval.hf	samplesize.hf
rs10048404	C	T	0.0313	0.0054	6.121e-09	0.6597	0.0105	0.0083	0.6298	0.2064	952914
rs10096633	C	T	0.033	0.0054	8.076e-10	0.8211	0.037	0.0124	0.8816	0.002835	950083
rs10101067	G	C	-0.0391	0.0069	1.277e-08	0.9141	0.0097	0.0153	0.927	0.5273	964031
rs10119430	G	A	0.0279	0.0046	1.763e-09	0.2209	0.0112	0.0094	0.2177	0.2367	964056
rs10159026	C	T	0.0273	0.0046	2.041e-09	0.7491	0.0187	0.0091	0.7536	0.03909	960966
rs10184004	C	T	0.0636	0.0041	4.391e-54	0.5951	0.0017	0.0079	0.5758	0.8268	958924
rs10188334	C	T	0.0544	0.0053	2.472e-24	0.8409	0.0339	0.0106	0.8309	0.001462	952156
rs10262104	C	T	0.022	0.0039	1.168e-08	0.4575	-0.0055	0.0078	0.5071	0.4781	958810
rs10404726	C	T	0.0255	0.0042	1.364e-09	0.4829	0.028	0.0079	0.5352	0.0003856	958621
rs10408163	C	T	0.0319	0.0043	1.071e-13	0.6016	0.0146	0.0086	0.7039	0.09046	955711
rs10440833	T	A	-0.1286	0.0041	1e-200	0.7028	-0.0043	0.0102	0.7229	0.675	584862
rs10469860	G	A	-0.0238	0.0043	3.842e-08	0.2755	-0.0064	0.0087	0.2796	0.4569	955746
rs10737818	G	A	0.0352	0.0052	1.974e-11	0.622	0.0031	0.0082	0.6493	0.7027	953711
rs10750397	G	A	-0.04	0.0042	1.743e-21	0.7146	-0.0016	0.0087	0.7154	0.856	953732
rs1075855	G	C	0.0263	0.0045	3.529e-09	0.2791	0.0054	0.0091	0.2642	0.549	952706
rs10758950	T	A	-0.026	0.0045	6.976e-09	0.7077	-0.0152	0.0101	0.821	0.1342	964021
rs10766076	T	A	0.026	0.0043	1.256e-09	0.7137	0.0222	0.009	0.7441	0.01347	962049
rs10767659	G	T	0.026	0.0042	4.556e-10	0.3538	0.0088	0.0083	0.3271	0.2922	958799
rs10773000	G	T	0.034	0.0041	5.583e-17	0.672	-0.0089	0.0083	0.6469	0.2857	961815
rs10806906	C	T	0.0223	0.0039	1.01e-08	0.4479	0.0091	0.0078	0.4952	0.2426	960798
rs10808671	G	A	-0.0358	0.0038	2.365e-21	0.5407	-0.008	0.0078	0.5083	0.3036	958794
rs10811661	C	T	-0.1471	0.0048	1e-200	0.2442	0.0227	0.0104	0.1731	0.02956	959561
rs10818763	C	T	0.0358	0.0051	2.412e-12	0.676	0.0026	0.0115	0.8657	0.8215	964056
rs10830963	G	C	0.0731	0.0042	1.294e-66	0.3057	0.0004	0.009	0.2749	0.9672	953732
rs10835690	T	A	-0.029	0.0052	2.46e-08	0.822	0.0178	0.012	0.8111	0.1396	588836
rs10844519	G	T	0.03	0.0042	1.361e-12	0.4092	0.0004	0.0087	0.2838	0.9606	958809
rs10879261	G	T	0.0341	0.0038	6.806e-19	0.388	0.0054	0.0079	0.4154	0.4952	958803
rs10889560	C	A	-0.0376	0.0063	2.049e-09	0.8891	-0.0339	0.0139	0.9143	0.0149	955746
rs10916780	G	A	-0.0342	0.0046	1.577e-13	0.2476	-0.009	0.0099	0.199	0.3636	952568
rs10937721	G	C	-0.0755	0.0043	7.196e-70	0.3904	-0.0166	0.008	0.4124	0.03808	956785
rs10938398	G	A	-0.0445	0.0039	1.488e-30	0.6065	-0.0389	0.008	0.5742	1.194e-06	953665
rs10993072	C	T	-0.0315	0.0041	2.933e-14	0.6647	-0.0029	0.0084	0.6708	0.7314	957163
rs10998338	G	A	-0.0308	0.0039	1.313e-15	0.5189	0.0074	0.0079	0.5502	0.35	958798
rs11046164	C	T	0.0289	0.0046	3.975e-10	0.7576	0.012	0.0088	0.7271	0.1739	958773
rs11048457	G	A	0.0385	0.0043	2.201e-19	0.3857	-0.0085	0.009	0.2587	0.3446	958813
rs11078916	C	T	-0.0326	0.0042	1.244e-14	0.6474	-0.0177	0.0088	0.7244	0.04595	956796
rs1109442	C	T	0.0218	0.0037	6.108e-09	0.4629	0.0172	0.0079	0.4681	0.02898	954402
rs11096542	G	A	-0.0254	0.0043	3.03e-09	0.3756	-0.0032	0.008	0.4176	0.6854	960567
rs11108094	C	A	-0.0571	0.0088	1.083e-10	0.9339	0.0026	0.0159	0.9337	0.8686	962057
rs11114650	G	C	-0.0447	0.0075	3.267e-09	0.7758	-0.0193	0.0307	0.9805	0.5302	958691
rs1111875	C	T	0.0928	0.0038	1.44e-128	0.549	0.0021	0.0079	0.5799	0.7888	962070
rs111283203	G	C	-0.0257	0.0047	3.411e-08	0.7612	0.0157	0.0107	0.8344	0.1436	958793
rs11150745	G	A	-0.0312	0.0053	5.171e-09	0.3173	-0.0255	0.0085	0.3179	0.002512	958773
rs11155073	C	T	-0.0275	0.0039	1.409e-12	0.5159	-0.0066	0.0079	0.5784	0.4002	955743
rs11159347	C	T	-0.0248	0.0041	1.472e-09	0.3435	0.0066	0.0084	0.3275	0.4307	955712
rs11173646	T	A	-0.0285	0.0047	1.448e-09	0.7362	-0.0143	0.0103	0.8246	0.1626	956826
rs111765639	G	A	0.0581	0.0084	5.367e-12	0.876	0.0383	0.025	0.9715	0.1251	956298
rs11181613	C	A	0.0418	0.006	2.378e-12	0.8686	0.0015	0.0117	0.8637	0.8951	953560
rs11199116	C	A	0.0306	0.005	1.01e-09	0.1909	0.0136	0.0095	0.2129	0.1506	964034
rs11201992	C	A	0.0251	0.0038	5.755e-11	0.4767	0.0207	0.0078	0.5408	0.008205	958802
rs112324411	C	T	0.0729	0.0103	1.417e-12	0.9377	-0.0038	0.018	0.9268	0.8324	902853
rs11236524	C	T	0.0363	0.0064	1.125e-08	0.2408	-0.0149	0.02	0.102	0.4557	172505
rs11240351	G	A	0.0256	0.004	1.123e-10	0.4696	0.005	0.008	0.4231	0.5301	950620
rs112515915	G	A	-0.0562	0.0085	3.177e-11	0.0691	-0.0143	0.0156	0.0673	0.36	958767
rs11257655	C	T	-0.0946	0.0056	1.442e-63	0.7044	-0.0041	0.0095	0.7797	0.6701	955712
rs11258422	C	A	0.0241	0.0041	3.181e-09	0.4091	-0.0054	0.0081	0.3668	0.5087	964013
rs1127215	C	T	0.0412	0.0039	1.808e-26	0.6041	0.0017	0.008	0.5809	0.8309	950638
rs113135335	G	T	-0.0533	0.0073	2.103e-13	0.1038	0.0047	0.0126	0.1109	0.7121	955665
rs113414093	G	A	-0.0724	0.0128	1.681e-08	0.9459	-0.0051	0.0197	0.9288	0.7974	877118
rs114136102	C	T	0.0631	0.0114	2.809e-08	0.0384	-0.0059	0.0194	0.0464	0.7605	951879
rs11561066	C	T	0.0451	0.0065	3.349e-12	0.1301	0.0488	0.0139	0.0958	0.0004474	946567
rs11583755	C	A	0.0369	0.0041	1.31e-19	0.3287	0.0052	0.0082	0.3543	0.5248	952603
rs11602873	T	A	-0.0987	0.0059	1.976e-62	0.1459	0.0149	0.0105	0.1703	0.156	958791
rs11614914	C	T	-0.0394	0.0044	2.64e-19	0.7033	-0.0024	0.0084	0.6636	0.7758	952195
rs11616380	G	T	0.0764	0.0043	1.018e-69	0.7299	0.002	0.0087	0.7177	0.8211	962039
rs11646052	G	A	0.026	0.0039	2.661e-11	0.4116	0.002	0.0081	0.4028	0.8055	956514
rs11651755	C	T	0.0663	0.0038	8.607e-67	0.4671	0.0016	0.008	0.4771	0.8373	944722
rs116861182	C	A	0.0615	0.0105	5.371e-09	0.0534	0.0339	0.0172	0.0632	0.0491	924935
rs11708067	G	A	-0.0804	0.005	1.626e-57	0.2229	0.0041	0.0095	0.2215	0.6656	950670
rs117316450	G	C	0.1328	0.0171	9.458e-15	0.0183	-0.0447	0.0307	0.0195	0.145	933070
rs11759026	G	A	0.0585	0.0057	1.166e-24	0.3164	-0.0037	0.0094	0.2326	0.6921	953744
rs117642733	C	T	-0.0762	0.0133	9.452e-09	0.9584	-0.015	0.0234	0.9542	0.5223	866586
rs11830241	C	T	-0.0411	0.0072	1.171e-08	0.9008	0.0047	0.0152	0.9236	0.7565	952861
rs11848361	G	A	0.0478	0.0085	2.151e-08	0.9213	0.0119	0.0145	0.9172	0.411	956701
rs11858759	G	A	0.0236	0.0043	4.263e-08	0.7302	-0.0045	0.0086	0.6987	0.6013	956728
rs11870735	C	T	-0.0314	0.0054	7.58e-09	0.824	-0.0167	0.0103	0.8207	0.103	956810
rs11913442	C	T	-0.0245	0.004	8.216e-10	0.3799	-0.0199	0.0081	0.3779	0.01417	958762
rs11929640	G	A	-0.0245	0.0042	8.51e-09	0.6454	-0.0013	0.0092	0.752	0.8865	950651
rs11994255	C	T	-0.0239	0.0043	1.824e-08	0.7191	-0.0042	0.0088	0.7159	0.6285	953732
rs11998023	G	T	0.0324	0.0053	8.998e-10	0.1765	-0.0009	0.0101	0.1905	0.9294	955676
rs12001437	C	T	0.0301	0.0038	4.384e-15	0.4071	-0.0046	0.0081	0.371	0.5709	958748
rs12041243	G	A	-0.0293	0.0047	3.257e-10	0.2426	0.0032	0.0099	0.1942	0.748	960955
rs12056338	G	T	-0.0251	0.004	2.183e-10	0.6086	0.0057	0.0081	0.5853	0.4836	953730
rs12116935	G	A	0.0242	0.0043	1.518e-08	0.3536	-0.0034	0.0081	0.3866	0.6766	952649
rs12128213	G	A	-0.0256	0.0042	1.502e-09	0.4713	-0.0088	0.008	0.499	0.2688	949799
rs12140153	G	T	0.0453	0.0083	4.979e-08	0.9128	0.0081	0.0138	0.9027	0.5557	945194
rs12151653	C	T	-0.0267	0.0043	6.481e-10	0.7352	0.0151	0.0085	0.6932	0.0746	955737
rs12185519	C	T	-0.036	0.0054	2.538e-11	0.8081	-0.0179	0.0098	0.7926	0.06724	956715
rs12187734	C	T	0.0287	0.0039	2.183e-13	0.5665	-0.0069	0.0078	0.5206	0.3747	964039
rs12192275	G	A	0.0482	0.005	4.074e-22	0.7885	0.0013	0.0093	0.7639	0.8868	951701
rs12380322	G	A	0.0295	0.004	1.64e-13	0.3922	-0.0073	0.008	0.4026	0.3585	958811
rs12419690	G	A	0.0298	0.004	1.389e-13	0.5115	0.0068	0.0078	0.4528	0.3825	956789
rs12422600	G	A	0.024	0.004	3.137e-09	0.6382	0.0107	0.0081	0.6257	0.1862	958666
rs12433335	C	T	-0.0213	0.0038	1.577e-08	0.568	-0.0264	0.0079	0.5925	0.0008748	964048
rs12454712	C	T	-0.0424	0.0039	2.417e-27	0.4059	-0.0105	0.0085	0.3943	0.2171	942930
rs12494424	G	C	-0.0656	0.0117	2.339e-08	0.9582	-0.0546	0.0204	0.9541	0.007489	944322
rs12505942	C	T	-0.0294	0.0042	1.834e-12	0.3133	-0.0226	0.0082	0.3468	0.005804	960940
rs12539264	G	A	0.029	0.0045	8.568e-11	0.2656	-0.0012	0.0087	0.2831	0.8945	963945
rs1260326	C	T	0.0625	0.0039	2.159e-57	0.5805	-0.0087	0.0081	0.6127	0.2797	952650
rs12603589	C	T	0.0421	0.0046	1.06e-19	0.3128	0.0174	0.01	0.1916	0.08145	964013
rs12625671	C	T	0.0603	0.0055	6.077e-28	0.2326	-0.0032	0.0127	0.112	0.8027	956752
rs12667919	C	A	-0.0256	0.0047	3.624e-08	0.7087	-0.0006	0.0093	0.7637	0.9528	957131
rs12669521	G	A	-0.0263	0.0044	2.843e-09	0.2961	-0.0059	0.0084	0.332	0.4867	956696
rs12680217	C	T	-0.0397	0.0071	2.451e-08	0.301	-0.025	0.0169	0.0714	0.138	910261
rs12746673	C	A	0.0308	0.0049	3.304e-10	0.2076	0.0007	0.0094	0.228	0.9393	958885
rs12789028	G	A	-0.0459	0.005	3.897e-20	0.8198	0.0121	0.0103	0.8185	0.2415	956824
rs12825669	G	A	0.0226	0.0041	3.749e-08	0.6672	0.0052	0.0082	0.64	0.5216	956797
rs12856169	G	A	0.0364	0.0061	2.74e-09	0.7716	-0.0057	0.009	0.73	0.5314	951745
rs12883788	C	T	-0.0327	0.004	2.821e-16	0.5887	-0.0097	0.0079	0.5342	0.2205	958583
rs12892257	G	A	0.0288	0.005	1.03e-08	0.4862	0.0009	0.008	0.4098	0.9147	958759
rs12910361	G	A	0.0686	0.004	5.187e-65	0.614	0.015	0.0086	0.7072	0.08053	964057
rs12918782	G	A	0.0308	0.0047	4.571e-11	0.2568	-0.0055	0.0108	0.1625	0.6093	953052
rs12932337	C	T	-0.034	0.0052	8.343e-11	0.8301	-0.0095	0.0103	0.8172	0.3548	957149
rs12986742	C	T	0.0353	0.0038	5.525e-21	0.4727	0.0198	0.0079	0.4772	0.01214	952534
rs12992995	C	A	0.0272	0.0048	1.115e-08	0.7548	-0.0019	0.009	0.7315	0.8353	953128
rs13059382	G	T	0.0356	0.0059	1.404e-09	0.7216	0.0274	0.0146	0.922	0.06104	960983
rs13094957	C	T	-0.0637	0.0047	2.348e-42	0.2196	0.008	0.0094	0.2179	0.399	960994
rs13099581	C	T	0.0371	0.0058	1.276e-10	0.8192	0.0223	0.0112	0.856	0.04605	955749
rs13107325	C	T	-0.0473	0.0086	3.271e-08	0.9265	-0.0701	0.017	0.9282	3.971e-05	952649
rs13237518	C	A	-0.0283	0.0038	1.988e-13	0.5207	-0.0123	0.0091	0.5929	0.1788	591081
rs13238568	G	A	0.0248	0.0041	1.718e-09	0.381	0.0215	0.0082	0.3797	0.009087	950969
rs13262861	C	A	0.1021	0.0054	8.202e-79	0.8326	-0.0052	0.0123	0.8208	0.6693	588906
rs13266634	C	T	0.1024	0.0041	4.23e-136	0.6814	0.0055	0.0085	0.6778	0.5156	951946
rs13268508	C	T	-0.0376	0.0041	4.071e-20	0.6277	0.004	0.0082	0.6299	0.6268	956483
rs1327123	G	C	-0.0242	0.0039	6.772e-10	0.6447	-0.0019	0.0081	0.6415	0.8177	955741
rs13288108	C	A	0.0274	0.005	4.776e-08	0.8218	-0.0006	0.0102	0.8198	0.9563	964057
rs13330163	G	A	-0.021	0.0038	4.183e-08	0.4576	-0.0024	0.0079	0.4365	0.7645	964000
rs13365225	G	A	0.0327	0.0046	1.547e-12	0.2605	-0.0027	0.0107	0.1655	0.8039	964034
rs13406280	C	T	0.0269	0.0039	5.657e-12	0.566	-0.0025	0.0078	0.4962	0.7468	955659
rs13415288	C	T	0.0262	0.004	9.163e-11	0.3654	0.0133	0.0083	0.3431	0.1079	952182
rs13434089	C	T	-0.0607	0.0052	4.447e-31	0.2034	0.0025	0.0118	0.129	0.8302	958923
rs138771	G	A	-0.0259	0.0044	3.784e-09	0.6895	0.001	0.0098	0.7972	0.9152	956817
rs1408579	C	T	0.0275	0.0042	6.112e-11	0.5591	0.0158	0.0077	0.5184	0.04063	964053
rs1412234	C	T	0.0397	0.0042	4.419e-21	0.2864	0.0205	0.0083	0.3253	0.01356	963973
rs1421085	C	T	0.1182	0.004	1.29e-189	0.367	0.0409	0.008	0.415	3.24e-07	953732
rs142385484	C	T	0.0336	0.006	1.961e-08	0.8518	-0.0014	0.0109	0.8314	0.8948	952935
rs1426371	G	A	0.0429	0.0045	1.291e-21	0.692	-0.013	0.0091	0.7358	0.1537	954021
rs1431819	G	A	0.0294	0.0046	1.994e-10	0.7075	0.0053	0.0086	0.7004	0.5376	956732
rs144052331	C	T	-0.0709	0.0098	3.968e-13	0.0539	-0.018	0.0218	0.0398	0.4101	956267
rs145904381	C	T	-0.1607	0.0221	4.008e-13	0.0104	0.0359	0.0359	0.0176	0.3178	911152
rs146716733	C	T	0.0451	0.0079	1.244e-08	0.9213	0.0207	0.0174	0.9432	0.2356	958788
rs1470560	G	A	-0.0245	0.004	1.22e-09	0.6433	-0.0191	0.0081	0.6249	0.01751	955738
rs148106383	C	T	-0.0928	0.0156	2.705e-09	0.9747	-0.0299	0.0288	0.9751	0.2987	931922
rs149027146	T	A	0.0738	0.0104	1.575e-12	0.0602	0.0446	0.0168	0.0644	0.008031	926811
rs149336329	G	T	0.0869	0.01	2.864e-18	0.9566	-0.0089	0.0194	0.9528	0.6482	956221
rs152839	C	T	0.0281	0.0039	1.068e-12	0.6058	0.0063	0.0079	0.557	0.4269	963957
rs1561927	C	T	0.0332	0.0046	4.965e-13	0.31	-0.009	0.009	0.2652	0.3137	955712
rs1567353	G	C	0.0278	0.004	7.059e-12	0.3612	0.0048	0.0084	0.3165	0.5669	956799
rs1570247	G	A	0.0244	0.0039	2.91e-10	0.5982	-0.0217	0.0079	0.5667	0.005868	958795
rs1650505	G	A	-0.0409	0.0045	1.689e-19	0.7722	0.006	0.0099	0.7988	0.5453	955709
rs1662185	A	G	0.0226	0.0041	3.481e-08	0.576	0.0015	0.0086	0.2926	0.8655	956762
rs16881572	G	A	-0.0681	0.011	5.678e-10	0.9448	-0.0003	0.0246	0.973	0.9887	953236
rs16907058	G	A	-0.0461	0.0084	4.552e-08	0.941	-0.0154	0.0174	0.9467	0.3753	964051
rs17035289	C	T	0.0357	0.0048	1.534e-13	0.2062	-0.0066	0.0105	0.1752	0.53	952649
rs17036160	C	T	0.1007	0.0065	1.538e-53	0.8874	0.0094	0.0119	0.874	0.4286	953715
rs17265513	C	T	0.0327	0.0055	2.981e-09	0.189	-0.0041	0.0098	0.2083	0.6726	953732
rs17439448	C	T	-0.0393	0.0067	3.739e-09	0.8842	-0.0112	0.0124	0.8872	0.3692	963974
rs174541	T	C	0.0277	0.0041	2.394e-11	0.3493	0.0197	0.0081	0.6277	0.01532	962013
rs17662402	C	T	-0.067	0.01	2.382e-11	0.053	0.0099	0.0174	0.0574	0.5698	954589
rs177045	G	A	0.0335	0.004	2.743e-17	0.4055	0.0049	0.0087	0.3104	0.5741	946838
rs17747955	C	T	0.0224	0.004	1.559e-08	0.4496	-0.0049	0.0078	0.4966	0.5272	964036
rs17772814	G	A	0.0685	0.0124	3.382e-08	0.917	-0.0164	0.0161	0.9099	0.3092	900394
rs17810376	G	A	0.0279	0.0047	2.837e-09	0.2974	0.0099	0.0083	0.3266	0.2308	964044
rs1801645	C	T	0.0374	0.0045	4.183e-17	0.2778	0.0056	0.0094	0.2899	0.5479	915345
rs1812707	C	T	-0.0227	0.0039	5.865e-09	0.4367	-0.0058	0.0079	0.5087	0.4581	958804
rs1815591	T	A	-0.0313	0.0041	3.171e-14	0.5927	-0.0051	0.0082	0.6167	0.5351	957873
rs187653072	C	T	0.0967	0.0138	2.223e-12	0.0271	-0.0293	0.0239	0.0305	0.2199	956229
rs1877712	G	A	0.0211	0.0039	4.668e-08	0.4523	-0.0019	0.0079	0.4404	0.813	955731
rs1885234	G	T	0.0244	0.0039	2.678e-10	0.3946	-0.0105	0.0079	0.4286	0.1847	964043
rs1922879	G	A	0.023	0.0041	2.114e-08	0.6293	-0.0097	0.0082	0.6638	0.2414	964036
rs1929883	G	A	0.0275	0.005	3.99e-08	0.601	0.02	0.008	0.5758	0.01267	953383
rs197374	C	T	-0.0224	0.0039	7.761e-09	0.5929	0.0015	0.008	0.612	0.8525	960965
rs1996617	C	T	0.0289	0.004	6.541e-13	0.3914	0.0186	0.0087	0.2917	0.03172	950670
rs2031847	G	C	-0.0752	0.0133	1.441e-08	0.9668	0.0421	0.0285	0.9794	0.1395	958476
rs2032217	G	A	-0.0268	0.004	2.696e-11	0.6671	-0.0152	0.0087	0.6985	0.08168	935539
rs2040792	C	A	0.031	0.0039	1.994e-15	0.461	0.005	0.008	0.3863	0.5312	964043
rs2056857	C	T	0.0256	0.0039	5.163e-11	0.5888	-0.0039	0.008	0.5854	0.6295	956652
rs2066827	G	T	0.0321	0.0051	2.215e-10	0.289	0.0155	0.0099	0.2397	0.1163	942930
rs2115107	G	A	-0.0357	0.0039	2.26e-20	0.5948	-0.0124	0.0082	0.6125	0.1292	956725
rs2125799	C	T	0.0244	0.0041	3.566e-09	0.3305	0.008	0.0084	0.34	0.3405	953142
rs2150999	C	T	0.0243	0.0039	5.539e-10	0.5367	0.0164	0.0081	0.608	0.04192	956797
rs2169033	C	T	-0.0325	0.0041	1.419e-15	0.34	-0.007	0.0086	0.303	0.4157	953996
rs217256	C	T	0.021	0.0037	1.356e-08	0.4926	0.0003	0.0078	0.4705	0.9648	958699
rs2188848	G	A	-0.0325	0.0048	1.172e-11	0.2109	-0.0118	0.01	0.189	0.2363	958811
rs2216063	G	A	-0.0296	0.0054	3.468e-08	0.1982	-0.005	0.013	0.1043	0.7022	955574
rs2237897	C	T	0.2199	0.0068	1e-200	0.7624	0.028	0.0196	0.9518	0.1526	955796
rs2240716	C	T	-0.0262	0.0042	4.832e-10	0.7069	0.0008	0.0085	0.6785	0.9236	953721
rs2252115	G	A	-0.0237	0.0039	1.293e-09	0.4284	-0.0045	0.0079	0.4711	0.5661	953732
rs2255703	C	T	-0.0256	0.0039	3.698e-11	0.404	-0.0069	0.0081	0.3822	0.3948	952650
rs2257883	G	A	-0.071	0.0049	3.86e-47	0.7363	0.0151	0.0117	0.8681	0.1955	958804
rs2269247	C	T	0.0356	0.0049	3.404e-13	0.8094	-0.0059	0.0101	0.8122	0.5617	960948
rs2272163	C	A	0.0235	0.004	3.551e-09	0.6367	0.0168	0.0081	0.6249	0.03862	960899
rs2277339	G	T	0.0437	0.0056	6.916e-15	0.1427	-0.0143	0.0133	0.1024	0.2837	951946
rs2280141	G	T	-0.0455	0.0048	6.044e-21	0.512	-0.0007	0.0079	0.4959	0.9314	955707
rs2282456	G	A	-0.0351	0.0042	7.426e-17	0.7154	0.0042	0.0084	0.6744	0.6171	952650
rs2289739	G	T	-0.0364	0.0055	4.351e-11	0.6873	-0.0083	0.0082	0.6414	0.3139	961994
rs2290203	G	A	-0.0506	0.0043	2.331e-31	0.6998	-0.0051	0.0098	0.7953	0.6018	952653
rs2394186	G	A	-0.0271	0.0048	1.882e-08	0.2192	-0.0083	0.0108	0.1774	0.4422	915140
rs2408252	C	T	-0.0264	0.0043	1.057e-09	0.5375	0.0059	0.0079	0.577	0.4547	958789
rs2409742	C	T	0.0341	0.0042	2.779e-16	0.5255	0.0098	0.0082	0.4993	0.2294	958483
rs242105	C	A	0.039	0.0059	3.575e-11	0.4085	0.017	0.0087	0.2859	0.04993	963765
rs243513	G	A	0.0232	0.0043	4.691e-08	0.71	0.0045	0.0087	0.7115	0.6048	958790
rs244415	G	A	0.0401	0.0041	2e-22	0.6296	0.0257	0.0079	0.5733	0.001117	964057
rs2447198	C	T	-0.034	0.0055	5.019e-10	0.2235	-0.0006	0.0136	0.0918	0.9665	956830
rs2453051	C	A	0.0609	0.0061	1.079e-23	0.1522	0.0056	0.013	0.1083	0.6662	946785
rs247975	C	T	0.0254	0.0038	2.008e-11	0.5623	0.016	0.0079	0.5462	0.04319	950670
rs2482506	C	G	0.0316	0.0045	2.26e-12	0.2389	0.0006	0.0089	0.263	0.9454	964048
rs2513505	A	C	0.024	0.0038	4.102e-10	0.4068	-0.0054	0.0079	0.5956	0.4914	958811
rs2591392	G	A	0.0306	0.0039	1.885e-15	0.6247	0.0098	0.0081	0.6204	0.2285	955706
rs2605281	G	A	-0.0283	0.0041	6.893e-12	0.6128	-0.0152	0.0087	0.7128	0.0792	955734
rs2608953	C	T	-0.0348	0.005	3.33e-12	0.7889	-0.0106	0.0103	0.8232	0.3033	960923
rs2613499	G	A	-0.0363	0.0053	1.041e-11	0.199	-0.013	0.0101	0.1872	0.1985	953682
rs261967	C	A	0.0235	0.0038	8.046e-10	0.414	0.0264	0.0079	0.426	0.0008237	964057
rs2633311	C	T	0.0237	0.004	3.122e-09	0.4972	0.0272	0.0079	0.5589	0.0005446	963983
rs2662390	C	T	-0.0276	0.0048	1.033e-08	0.7419	-0.0072	0.0105	0.8274	0.4937	958807
rs2679745	G	A	0.0278	0.0049	1.896e-08	0.8139	0.0046	0.0101	0.81	0.649	948464
rs2723065	G	A	-0.0422	0.0039	7.186e-28	0.3817	-0.0057	0.008	0.3867	0.4721	960958
rs2725370	C	T	-0.0319	0.0046	3.303e-12	0.7126	-0.0128	0.0085	0.6938	0.1301	958804
rs2730827	T	C	0.0279	0.0038	2.102e-13	0.5145	0.0117	0.0078	0.4821	0.1331	958771
rs2780215	G	A	-0.0531	0.0091	6.149e-09	0.1001	0.0583	0.0323	0.0408	0.07129	169369
rs2796441	G	A	0.0609	0.0039	2.921e-55	0.5596	-0.0109	0.0081	0.5977	0.178	953731
rs2816177	G	A	0.0224	0.0039	6.821e-09	0.3994	0.0049	0.008	0.4104	0.5418	950575
rs2820446	G	C	-0.0407	0.0042	2.294e-22	0.2993	-0.0012	0.0085	0.2989	0.8853	958926
rs28408270	G	T	0.0239	0.0039	1.07e-09	0.4896	-0.0061	0.0078	0.5355	0.4362	955748
rs28490139	G	A	0.0375	0.0053	1.543e-12	0.8415	-0.0134	0.0109	0.8425	0.2159	956821
rs28642213	G	A	0.0822	0.0047	5.713e-68	0.7572	0.0152	0.0097	0.7522	0.1165	922826
rs2867570	G	A	0.026	0.0039	2.129e-11	0.5716	0.0077	0.008	0.5977	0.3341	964057
rs28712435	C	T	0.0254	0.0039	6.104e-11	0.5483	0.0095	0.0078	0.5125	0.2243	955593
rs2872246	C	A	-0.0266	0.004	2.558e-11	0.5962	-0.0041	0.0078	0.5361	0.5942	955712
rs28758542	G	A	-0.0256	0.0042	1.671e-09	0.3408	0.0085	0.0089	0.3153	0.3402	923127
rs2876354	C	T	0.0465	0.0038	1.431e-34	0.5168	0.0123	0.0078	0.5294	0.1171	960988
rs28792187	G	A	0.0414	0.0076	4.125e-08	0.0729	0.0025	0.0155	0.0715	0.8695	958813
rs28819812	C	A	0.033	0.0042	2.551e-15	0.6586	-0.0079	0.01	0.6807	0.4302	579120
rs2913873	G	A	-0.0316	0.0056	1.531e-08	0.1435	-0.0155	0.0107	0.163	0.1497	956739
rs2943650	C	T	-0.0805	0.0042	1.895e-81	0.3616	-0.0032	0.0081	0.3667	0.6887	958971
rs2952858	G	A	-0.0237	0.0041	1.117e-08	0.5987	-0.0047	0.0087	0.7217	0.5889	955714
rs2956092	C	T	-0.0254	0.004	1.679e-10	0.6526	-0.0111	0.0084	0.6906	0.186	958813
rs3012060	T	A	0.0342	0.0055	5.943e-10	0.1852	0.0277	0.0123	0.1139	0.02434	956828
rs3020781	G	A	0.0294	0.0043	7.286e-12	0.3719	0.0035	0.0088	0.2701	0.6916	950605
rs302395	G	T	0.0232	0.0041	1.48e-08	0.3221	0.0067	0.0081	0.357	0.4072	964054
rs303760	C	T	-0.0334	0.0044	2.038e-14	0.6887	-0.0334	0.0082	0.6391	4.288e-05	958739
rs305686	C	T	0.0294	0.0053	2.287e-08	0.6267	-0.0031	0.0085	0.64	0.7178	953333
rs3122231	C	T	0.0271	0.0044	5.797e-10	0.6586	0.0047	0.0084	0.6716	0.5721	956799
rs3130283	C	A	0.0617	0.0057	5.8e-27	0.8533	-0.0058	0.0115	0.8358	0.6122	945315
rs3130931	C	T	0.0482	0.0041	2.341e-32	0.6765	-0.0125	0.0088	0.6732	0.1548	945074
rs314879	C	T	0.0364	0.0046	2.841e-15	0.2288	0.0098	0.0098	0.2141	0.3182	951424
rs329118	C	T	-0.0281	0.0038	2.004e-13	0.5849	-0.0078	0.0079	0.5705	0.3211	958811
rs33959228	C	T	0.0915	0.0155	3.391e-09	0.9785	-0.0002	0.0279	0.9758	0.9944	923058
rs340874	C	T	0.0543	0.0039	6.472e-45	0.4991	0.0052	0.008	0.5541	0.5111	950670
rs34247110	G	A	-0.0305	0.0038	2.074e-15	0.5159	-0.0049	0.0078	0.504	0.5336	955746
rs34298980	C	T	-0.0354	0.0055	1.166e-10	0.4713	-0.0112	0.0084	0.5015	0.1812	952566
rs34329895	G	A	-0.0255	0.004	1.44e-10	0.5376	0.0084	0.008	0.6193	0.2946	953710
rs34506349	G	A	0.0665	0.0116	1.035e-08	0.9609	0.0039	0.0203	0.9557	0.8485	951174
rs34584161	G	A	-0.0565	0.0044	1.623e-37	0.2837	-0.0032	0.0092	0.2435	0.7312	956731
rs34617913	G	A	-0.0239	0.0043	2.898e-08	0.2966	0.0061	0.0096	0.2136	0.5225	955737
rs348330	G	A	0.0497	0.0054	2.805e-20	0.4544	0.014	0.0083	0.3566	0.09244	953055
rs34845373	G	A	-0.0334	0.0048	5.258e-12	0.2557	-0.0148	0.0089	0.2646	0.09712	953755
rs35011184	G	A	-0.2508	0.005	1e-200	0.7797	-0.0054	0.0095	0.7736	0.5678	957494
rs35164294	G	T	-0.0525	0.0092	1.346e-08	0.9288	-0.0209	0.0158	0.9246	0.1853	946608
rs35251247	G	A	-0.0309	0.0042	1.742e-13	0.7065	-0.0264	0.0087	0.7161	0.002405	958625
rs35753840	C	A	0.0254	0.0042	9.645e-10	0.34	0.0099	0.0081	0.3737	0.2183	958770
rs35895680	C	A	0.0499	0.0047	8.41e-27	0.7066	0.0293	0.0086	0.6828	0.0006664	956590
rs35901985	G	A	-0.0332	0.0053	2.596e-10	0.1853	-0.0055	0.0113	0.1714	0.626	917183
rs36062478	C	T	0.0389	0.0054	6.782e-13	0.178	-0.0126	0.0113	0.1417	0.268	958748
rs36111056	G	A	0.0303	0.0053	1.352e-08	0.7922	-0.0017	0.011	0.7801	0.8793	591051
rs362307	C	T	-0.048	0.0087	3.257e-08	0.9265	-0.0134	0.0146	0.9178	0.3558	953606
rs366577	C	T	0.0222	0.004	4.063e-08	0.4942	0.0069	0.0091	0.4181	0.4515	596308
rs3735491	C	A	-0.025	0.0043	7.069e-09	0.6921	-0.0112	0.0089	0.7372	0.2096	961998
rs3744347	G	A	-0.0301	0.0046	4.759e-11	0.253	0.0107	0.0095	0.2163	0.2573	958813
rs3747207	G	A	-0.0412	0.0044	3.694e-21	0.7178	0.0089	0.0094	0.7765	0.3468	958770
rs3751239	G	C	-0.0687	0.0047	1.951e-47	0.2193	-0.0094	0.01	0.1965	0.3433	962062
rs3753693	C	T	0.0255	0.004	1.109e-10	0.549	0.0052	0.008	0.5813	0.5127	952593
rs3755879	G	A	-0.0273	0.0042	5.557e-11	0.6555	0.0045	0.0085	0.6951	0.5962	955684
rs379417	G	A	-0.0278	0.0042	4.795e-11	0.6491	0.0166	0.0089	0.712	0.06134	951700
rs3798519	C	A	0.0474	0.0047	5.596e-24	0.2086	0.0217	0.01	0.1887	0.02953	954785
rs3802219	C	T	-0.0357	0.0039	1.07e-19	0.6082	-0.0031	0.0079	0.5721	0.6971	956827
rs3816605	C	T	-0.0318	0.0043	8.847e-14	0.4355	-0.0098	0.008	0.4405	0.2206	950364
rs38221	C	T	-0.0286	0.0047	1.514e-09	0.764	0.0087	0.0091	0.7507	0.3399	961959
rs3828242	G	A	-0.0252	0.0043	6.495e-09	0.2696	0.0054	0.0086	0.2852	0.5342	958920
rs3845843	C	T	-0.0264	0.0038	2.389e-12	0.4918	-0.0159	0.0078	0.4974	0.04203	960895
rs3872707	G	A	-0.037	0.0054	9.755e-12	0.844	-0.023	0.0116	0.867	0.04714	960979
rs3887059	G	A	-0.0295	0.0043	5.119e-12	0.7364	-0.0156	0.0089	0.7397	0.0784	964036
rs3887925	C	T	-0.0401	0.0038	1.078e-25	0.4984	0.0093	0.0079	0.4656	0.2405	952650
rs3918298	G	A	0.1038	0.0101	7.951e-25	0.8823	0.0611	0.0267	0.9726	0.0221	900672
rs410150	C	T	0.0289	0.0048	1.227e-09	0.2139	0.0298	0.0096	0.2139	0.001904	964054
rs4129858	G	A	0.0223	0.0038	4.383e-09	0.4167	0.0047	0.0079	0.4136	0.5562	955675
rs41304257	G	A	-0.0318	0.0047	8.481e-12	0.2441	0.0009	0.0088	0.2711	0.9143	955725
rs4252505	G	A	0.0413	0.007	4.522e-09	0.1846	0.0271	0.0152	0.0743	0.0745	957143
rs429358	C	T	-0.0585	0.0055	1.895e-26	0.1469	-0.0227	0.0112	0.1571	0.0418	953025
rs4294149	C	T	-0.0217	0.0039	2.283e-08	0.6027	-0.0034	0.008	0.6199	0.6757	958799
rs4335	G	A	0.0304	0.0038	1.06e-15	0.4783	-0.0149	0.009	0.5272	0.09814	591066
rs4343858	G	A	0.0295	0.0045	5.38e-11	0.7216	0.0093	0.0097	0.7889	0.3332	958780
rs4382480	G	A	-0.0306	0.0042	2.039e-13	0.5386	0.0019	0.0082	0.5629	0.8125	958605
rs4384608	C	T	0.0266	0.0043	4.358e-10	0.4076	0.0026	0.008	0.4412	0.7441	956917
rs4397977	G	A	-0.0283	0.0042	1.074e-11	0.5764	-0.0141	0.0084	0.6641	0.09372	956404
rs4440243	C	T	-0.0246	0.0043	9.947e-09	0.4217	-0.002	0.0079	0.4486	0.8048	955633
rs4463416	C	A	-0.0237	0.0041	1.084e-08	0.3518	-0.0116	0.009	0.258	0.1952	958813
rs4479849	G	A	-0.0258	0.0039	2.644e-11	0.5861	0.0036	0.0081	0.6072	0.6606	956824
rs4482463	C	A	0.0316	0.0056	1.824e-08	0.2443	0.0123	0.0146	0.0811	0.4	958870
rs464605	C	T	-0.07	0.0041	8.037e-66	0.3465	-0.0056	0.0089	0.2614	0.527	956822
rs4655617	C	A	0.0256	0.004	1.677e-10	0.4786	0.0057	0.0079	0.4322	0.4699	952539
rs4658234	G	T	-0.0295	0.0051	9.114e-09	0.7716	0.0066	0.0093	0.7638	0.4799	952650
rs4671799	G	A	-0.0262	0.004	5.287e-11	0.6669	-0.0122	0.0084	0.6766	0.1446	955633
rs4673712	C	T	-0.0269	0.0045	1.65e-09	0.2897	0.004	0.0084	0.3126	0.632	960983
rs4709746	C	T	0.0565	0.0059	1.515e-21	0.866	0.0018	0.0118	0.869	0.8772	955656
rs4777857	G	A	0.0255	0.0039	4.808e-11	0.4391	0.0018	0.0084	0.3744	0.8265	953731
rs4788815	T	A	0.0231	0.004	7.338e-09	0.6518	-0.008	0.0083	0.6551	0.3306	962076
rs4805881	C	A	-0.0379	0.0039	8.438e-22	0.6207	0.0012	0.0084	0.6694	0.8819	958801
rs4807125	C	T	-0.0326	0.0059	2.586e-08	0.8476	0.0124	0.0118	0.8532	0.2951	944176
rs4809906	G	A	0.0345	0.004	5.074e-18	0.6206	0.0128	0.0081	0.6366	0.1161	958767
rs4810145	C	T	0.0303	0.0038	1.052e-15	0.5221	0.0101	0.0078	0.5202	0.1936	964025
rs4820323	G	C	0.0214	0.0039	3.609e-08	0.5841	-0.0162	0.0079	0.5845	0.04124	958806
rs4832290	C	T	-0.0267	0.0049	3.942e-08	0.7645	-0.0331	0.0095	0.7767	0.0004902	945254
rs4833687	C	T	-0.0267	0.0045	2.763e-09	0.7415	-0.0042	0.0087	0.7232	0.6314	955710
rs4834232	C	T	-0.0272	0.0047	9.422e-09	0.787	-0.001	0.0094	0.7697	0.9149	952649
rs4865796	G	A	-0.0481	0.0042	5.433e-30	0.2906	0.0147	0.0084	0.3137	0.08166	953716
rs4902002	G	A	0.0246	0.0041	1.367e-09	0.3474	0.0073	0.0087	0.292	0.4003	958707
rs4906272	C	T	-0.0299	0.0046	5.21e-11	0.7332	-0.0296	0.0106	0.836	0.005391	953724
rs4923864	G	A	0.0568	0.0061	1.693e-20	0.6905	-0.0022	0.0158	0.9232	0.8887	949772
rs4929965	G	A	-0.0676	0.0042	5.072e-57	0.6147	-0.0026	0.0082	0.6206	0.7548	953036
rs4930726	C	T	-0.0353	0.0041	7.533e-18	0.334	-0.0186	0.0084	0.333	0.02645	953732
rs4942883	C	A	0.0306	0.0053	8.621e-09	0.6053	0.0025	0.0117	0.5615	0.8304	174448
rs4976033	G	A	0.0251	0.0039	1.002e-10	0.4337	0.02	0.0082	0.4107	0.01497	953732
rs5010712	G	A	0.03	0.0051	2.862e-09	0.8124	-0.0084	0.011	0.8523	0.4468	955747
rs501470	G	T	-0.032	0.0038	1.616e-17	0.4559	0.0021	0.0079	0.4845	0.7881	950642
rs506597	G	A	0.041	0.0064	1.513e-10	0.8812	0.0154	0.0124	0.8872	0.2172	962051
rs510062	G	A	-0.022	0.0039	1.227e-08	0.4036	0.0032	0.0079	0.4226	0.6877	964029
rs524903	G	A	0.0428	0.0067	2.05e-10	0.8164	0.0242	0.0108	0.8384	0.02583	956806
rs529565	C	T	0.0415	0.0039	8.037e-27	0.3648	0.0413	0.0084	0.3326	8.019e-07	957864
rs529623	C	T	-0.0224	0.0038	4.26e-09	0.4961	0.0081	0.0079	0.522	0.3051	961273
rs539515	C	A	0.0358	0.0046	5.404e-15	0.2066	-0.0016	0.0098	0.196	0.8707	955751
rs55691245	G	A	0.0561	0.0064	1.77e-18	0.8671	0.0039	0.0113	0.8603	0.7279	955665
rs55812705	C	T	-0.0301	0.005	1.322e-09	0.2379	0.0051	0.0091	0.2447	0.5715	955749
rs55857387	C	T	-0.0441	0.0046	1.741e-21	0.2537	0.0026	0.0103	0.1823	0.8041	958663
rs56243018	C	A	-0.0833	0.0104	8.89e-16	0.046	0.0074	0.0185	0.0504	0.6892	951252
rs56281442	G	A	-0.025	0.0044	1.474e-08	0.3558	0.0088	0.0081	0.3757	0.2761	953733
rs56337234	C	T	0.0426	0.0041	3.098e-25	0.4958	-0.0237	0.0084	0.4974	0.004607	918705
rs56348580	G	C	0.0507	0.0047	1.483e-27	0.7058	0.0088	0.0085	0.6891	0.3005	958771
rs56365443	G	A	-0.0238	0.0042	1.819e-08	0.3202	-0.0212	0.0084	0.3484	0.0113	951897
rs56392746	G	A	0.0579	0.0076	3.445e-14	0.9169	0.0042	0.0141	0.9153	0.7638	958812
rs56799554	G	A	0.0327	0.0049	3.568e-11	0.1971	0.023	0.0106	0.171	0.03051	958651
rs56823429	C	A	0.0418	0.0045	3.33e-20	0.2685	-0.0072	0.0086	0.2912	0.4011	956798
rs57286125	G	C	-0.0609	0.0051	1.827e-33	0.8324	0.01	0.0104	0.8302	0.3393	958802
rs5762925	C	A	0.0267	0.0039	7.735e-12	0.3776	0.0284	0.0083	0.3352	0.0005898	964027
rs57767539	G	A	-0.0622	0.0091	7.239e-12	0.9362	0.0111	0.0173	0.9386	0.5229	954026
rs58090211	C	A	0.0539	0.0091	3.059e-09	0.8433	0.0027	0.0525	0.9854	0.9594	152796
rs583769	G	A	-0.0307	0.0043	7.78e-13	0.7164	0.0019	0.009	0.7494	0.8312	964050
rs58542926	C	T	-0.0721	0.0072	1.622e-23	0.9258	0.0388	0.0152	0.924	0.01081	947539
rs59020573	G	A	-0.0503	0.0088	1.32e-08	0.9075	-0.0056	0.0212	0.9589	0.7909	938039
rs59489841	C	T	0.0235	0.0042	3.148e-08	0.7015	0.0078	0.0088	0.7359	0.3759	955718
rs59646751	G	T	-0.0241	0.0041	3.359e-09	0.6929	-0.0127	0.0085	0.687	0.1324	958763
rs6011155	C	T	-0.0284	0.0039	5.845e-13	0.4137	-0.0137	0.0083	0.3732	0.09936	957440
rs6021276	C	T	-0.0283	0.004	2.238e-12	0.6262	-0.0074	0.0082	0.6471	0.3682	963686
rs60251368	G	A	0.0549	0.0078	2.18e-12	0.0681	0.0068	0.0159	0.067	0.669	956823
rs60384372	G	A	-0.0352	0.0042	4.322e-17	0.4504	-0.0069	0.0081	0.4744	0.3954	953418
rs6059662	G	A	0.0369	0.0043	2.068e-17	0.6963	-0.0024	0.0084	0.6781	0.7797	961886
rs6066138	G	A	0.042	0.0047	6.3e-19	0.7376	-0.0005	0.0088	0.7208	0.9507	953732
rs6073143	C	T	0.0304	0.0044	4.4e-12	0.7327	0.0126	0.0094	0.777	0.1794	964002
rs6137042	G	A	0.0263	0.0047	2.33e-08	0.697	-0.0077	0.0097	0.7969	0.4253	964011
rs61579137	G	A	-0.0309	0.0047	5.053e-11	0.6599	-0.0167	0.011	0.8521	0.1311	953759
rs61736066	G	A	0.0421	0.0064	4.907e-11	0.881	0.0294	0.0146	0.9166	0.04407	953067
rs61779284	G	A	-0.0703	0.0048	1.422e-48	0.7976	0.0048	0.0094	0.7807	0.612	955751
rs61817176	C	A	-0.0263	0.004	3.588e-11	0.4527	-0.007	0.0078	0.5186	0.3693	955743
rs61967710	G	A	-0.0554	0.0099	2.515e-08	0.9413	-0.0252	0.0227	0.9643	0.2669	954258
rs620191	G	T	-0.0234	0.0041	1.727e-08	0.6635	0.0092	0.0088	0.7278	0.2983	958796
rs62182438	T	A	0.0257	0.0045	1.118e-08	0.2595	0.017	0.0087	0.2871	0.0509	955688
rs62255926	T	A	-0.0252	0.0046	4.215e-08	0.2629	-0.0175	0.0087	0.2982	0.04328	955468
rs62262091	C	T	-0.0538	0.0084	1.514e-10	0.9134	-0.027	0.0135	0.9002	0.04586	949849
rs62271373	T	A	-0.0645	0.0101	1.412e-10	0.946	-0.0279	0.0183	0.9446	0.1268	946728
rs62452060	G	A	-0.0354	0.0059	1.712e-09	0.8638	-0.0051	0.012	0.8694	0.6684	942729
rs62490267	C	T	0.031	0.0057	4.803e-08	0.2791	0.0115	0.0086	0.3114	0.1791	956740
rs62492368	G	A	-0.0311	0.0041	1.541e-14	0.5958	0.0239	0.0086	0.6957	0.005476	956811
rs62618693	C	T	0.0819	0.0111	1.406e-13	0.9582	0.0005	0.0204	0.9576	0.9824	945973
rs6479591	G	A	-0.0326	0.0054	1.23e-09	0.2053	-0.0225	0.0123	0.1144	0.06663	964050
rs6495182	C	T	0.0405	0.0042	2.102e-22	0.6845	0.0025	0.0094	0.7669	0.7891	951919
rs6538805	C	T	-0.0303	0.0039	1.445e-14	0.4736	-0.0012	0.0081	0.3932	0.8861	961835
rs654629	G	C	0.0266	0.0039	5.183e-12	0.6079	0.0091	0.008	0.6062	0.2508	964048
rs6549112	G	T	-0.0268	0.004	1.587e-11	0.3328	0.0023	0.0083	0.363	0.7779	955751
rs6558173	G	T	-0.0245	0.004	7.259e-10	0.6556	0.006	0.0082	0.6475	0.4637	962012
rs6561273	G	C	-0.0303	0.0052	7.518e-09	0.3995	0.0104	0.0083	0.3896	0.207	961712
rs6565922	C	T	-0.0279	0.0039	6.184e-13	0.5752	-0.0016	0.008	0.6172	0.8463	958726
rs6567160	C	T	0.0539	0.0044	7.506e-34	0.2362	0.0324	0.0093	0.2367	0.0004732	953725
rs6597649	C	T	-0.0234	0.0039	2.288e-09	0.5196	-0.0101	0.008	0.5869	0.2036	955033
rs667920	G	T	-0.0324	0.0045	5.827e-13	0.2332	-0.0122	0.0095	0.2206	0.2017	950631
rs66815886	G	T	0.04	0.0042	1.033e-21	0.6877	0.0063	0.0087	0.7235	0.4734	955745
rs6710938	C	A	-0.0342	0.0046	1.642e-13	0.228	-0.0137	0.0094	0.2256	0.1425	955740
rs6712905	C	T	0.0279	0.0042	2.067e-11	0.3181	0.0297	0.009	0.2536	0.0009662	952650
rs6714523	G	A	-0.0401	0.0061	6.285e-11	0.8807	-0.0066	0.0121	0.8806	0.5864	953750
rs6715901	G	A	0.023	0.004	1.167e-08	0.5728	-0.0044	0.0079	0.5118	0.5758	952303
rs6716394	G	A	0.0275	0.0037	1.462e-13	0.4844	-0.0084	0.0079	0.4602	0.2868	955694
rs67269808	G	A	-0.0731	0.0078	1.026e-20	0.0722	0.0263	0.0156	0.0702	0.09229	958761
rs6741676	G	A	-0.0324	0.0042	6.516e-15	0.3067	-0.0046	0.0083	0.3303	0.5844	958996
rs676387	C	A	-0.0416	0.0041	3.318e-24	0.6806	0.0024	0.0087	0.7175	0.7807	964053
rs6766859	C	T	0.0275	0.004	8.121e-12	0.3864	0.0211	0.0081	0.3749	0.009286	953644
rs6777684	G	A	0.0548	0.0044	1.537e-35	0.6279	0.0179	0.008	0.61	0.02566	955657
rs6792892	C	T	0.0306	0.004	1.356e-14	0.4822	0.0165	0.0078	0.5123	0.03391	960995
rs6813195	C	T	0.0463	0.004	7.645e-31	0.6486	-0.0047	0.0091	0.7193	0.6045	924132
rs6835992	G	A	0.0287	0.0044	5.644e-11	0.7049	-0.0007	0.0085	0.703	0.938	960867
rs6870983	C	T	0.0287	0.0049	6.318e-09	0.7415	0.007	0.0095	0.7867	0.4637	964040
rs6885157	G	T	0.0372	0.0068	4.706e-08	0.7828	-0.0051	0.0129	0.8789	0.6953	951467
rs6897117	C	T	-0.0234	0.0042	1.948e-08	0.7055	0.0043	0.0085	0.7011	0.6145	964057
rs6946660	C	T	-0.0472	0.0039	3.324e-33	0.4145	-0.0175	0.0083	0.3365	0.03498	958808
rs6956980	C	T	0.0284	0.0038	9.546e-14	0.4669	-0.0013	0.0078	0.538	0.8688	958812
rs6972291	C	T	0.0283	0.0048	2.496e-09	0.3457	0.0197	0.0106	0.1777	0.0633	947677
rs697239	C	T	-0.0587	0.0038	4.771e-54	0.4453	-0.0121	0.0078	0.4742	0.1225	962059
rs6975279	C	A	-0.0431	0.0042	4.089e-25	0.7117	-0.0067	0.0089	0.7368	0.4521	955712
rs6976111	C	A	-0.0258	0.0046	1.514e-08	0.7218	-0.0051	0.0098	0.6777	0.6025	594253
rs6978327	C	T	-0.0233	0.004	4.792e-09	0.4111	-0.0185	0.0079	0.4256	0.01941	958784
rs7029718	G	A	-0.0273	0.0039	1.469e-12	0.596	-0.0173	0.008	0.5944	0.03033	958805
rs705145	C	A	-0.0234	0.0039	3.326e-09	0.6475	-0.0093	0.0082	0.6412	0.2568	953732
rs7071036	C	T	-0.051	0.0073	2e-12	0.1978	0.0041	0.0272	0.023	0.8807	935004
rs712315	T	A	0.0282	0.0051	3.895e-08	0.783	0.01	0.0108	0.8225	0.356	958810
rs7127212	C	T	-0.0227	0.0041	2.359e-08	0.6067	-0.0248	0.008	0.6054	0.002018	959363
rs7130522	C	A	0.0222	0.0041	4.829e-08	0.3293	-0.0015	0.0086	0.2922	0.859	963850
rs7132908	A	G	0.0297	0.004	7.436e-14	0.6431	0.031	0.0081	0.3863	0.0001337	953732
rs7134150	G	A	-0.0443	0.007	2.648e-10	0.9011	-0.0395	0.0162	0.9342	0.01463	961832
rs7147483	C	T	-0.0352	0.0041	9.406e-18	0.3364	0.0139	0.0087	0.2718	0.1109	964057
rs71495046	C	A	0.0399	0.0063	1.858e-10	0.121	-0.0037	0.014	0.0864	0.7912	958800
rs7156625	G	A	-0.053	0.0049	5.351e-27	0.7662	-0.0207	0.0095	0.7819	0.02907	953728
rs7163757	C	T	0.043	0.0038	6.082e-30	0.5556	0.0174	0.0079	0.5545	0.02889	953732
rs7169799	C	T	0.0213	0.0038	3.209e-08	0.4477	-0.0114	0.0079	0.4713	0.1511	948456
rs7178762	C	T	0.0323	0.0041	1.789e-15	0.4889	0.0185	0.0079	0.4649	0.01916	955711
rs7224711	C	T	0.0307	0.0038	1.231e-15	0.5196	0.0306	0.0078	0.4712	8.945e-05	964018
rs7227272	G	A	0.0408	0.0056	4.692e-13	0.8229	0.0229	0.0137	0.9083	0.09491	962077
rs723355	G	A	0.0237	0.0039	1.987e-09	0.5624	0.0186	0.0079	0.4817	0.01799	958724
rs7240767	C	T	0.034	0.0051	2.05e-11	0.4776	-0.0095	0.0082	0.3739	0.2472	953704
rs7246440	G	A	0.0299	0.0043	3.722e-12	0.6201	0.0042	0.0095	0.7612	0.6609	952053
rs72692804	G	C	0.0532	0.0084	2.902e-10	0.9274	-0.0013	0.0148	0.9226	0.9291	953148
rs7274134	C	T	0.0247	0.0041	2.283e-09	0.6695	0.0061	0.0092	0.7503	0.5043	953732
rs727734	T	A	-0.0292	0.0045	6.68e-11	0.2363	-0.009	0.0091	0.247	0.3238	955739
rs72802365	G	C	0.1074	0.008	1.099e-40	0.928	0.0362	0.0152	0.9257	0.01753	956806
rs72803684	C	T	-0.0666	0.0115	6.073e-09	0.9555	0.0209	0.0202	0.9532	0.3009	947298
rs72846863	G	A	0.0335	0.0061	4.634e-08	0.8557	0.0108	0.0113	0.856	0.3398	953612
rs72926932	C	A	0.0733	0.008	4.257e-20	0.0755	-0.0383	0.0141	0.0851	0.006603	958809
rs730497	G	A	-0.0552	0.005	9.31e-29	0.8275	-0.0193	0.0108	0.8372	0.0725	953731
rs730831	G	T	-0.0878	0.0072	4.813e-34	0.1945	0.002	0.0206	0.0414	0.9241	948851
rs73121277	C	T	0.026	0.0042	7.399e-10	0.2966	0.0027	0.0088	0.2705	0.7619	958779
rs73146095	C	T	0.0406	0.007	7.906e-09	0.9016	0.0211	0.0126	0.8877	0.09271	955741
rs7316626	A	G	0.0322	0.0054	3.333e-09	0.7968	0.029	0.0108	0.1559	0.007459	953732
rs73167517	G	T	-0.0411	0.0072	1.3e-08	0.9131	0.0186	0.0138	0.9074	0.1763	958753
rs73184014	G	A	-0.0298	0.0052	1.173e-08	0.2094	-0.0228	0.0097	0.2146	0.01836	956668
rs73221116	G	A	-0.0955	0.0106	2.059e-19	0.9577	-0.023	0.019	0.9501	0.2266	947463
rs73642097	G	A	0.0291	0.0049	2.099e-09	0.2052	0.0006	0.0112	0.1445	0.9585	956788
rs74677818	C	T	-0.0357	0.006	2.882e-09	0.8646	-0.0093	0.0123	0.8737	0.449	953657
rs7483027	C	T	-0.0267	0.0041	5.609e-11	0.3277	-0.0163	0.0081	0.3681	0.0439	964057
rs75080135	C	A	-0.0357	0.0049	2.402e-13	0.2074	0.0261	0.0097	0.2071	0.006924	955711
rs75253922	C	T	0.0402	0.0054	7.72e-14	0.1846	-0.0032	0.0101	0.1867	0.7517	958730
rs75307421	G	A	-0.0737	0.0132	2.595e-08	0.9687	-0.001	0.0319	0.9829	0.9755	934025
rs7538321	T	A	0.0287	0.0051	1.688e-08	0.1952	0.0116	0.0115	0.1372	0.3106	959006
rs75432112	G	A	-0.1319	0.0104	6.413e-37	0.9536	-0.0251	0.0189	0.9506	0.1849	946876
rs7546252	G	A	-0.0262	0.0041	2e-10	0.5727	-0.0218	0.0079	0.5683	0.006161	951601
rs7554251	C	T	0.0297	0.0045	2.86e-11	0.7016	-0.0218	0.0089	0.7362	0.01377	955750
rs75619936	G	C	0.0314	0.0056	2.415e-08	0.1329	0.0266	0.0126	0.1081	0.0352	958792
rs757110	C	A	0.0599	0.0039	4.593e-52	0.3704	0.0119	0.0082	0.3765	0.143	953732
rs76263492	G	T	-0.0675	0.0114	3.234e-09	0.9579	-0.044	0.0201	0.9562	0.0285	947476
rs7629	G	A	-0.0311	0.0042	8.193e-14	0.5279	-0.0256	0.0079	0.5446	0.001223	945394
rs7633673	G	A	0.0306	0.0038	8.205e-16	0.5904	0.0024	0.0081	0.6086	0.7714	950622
rs7645613	C	T	0.034	0.0048	1.517e-12	0.3572	0.0094	0.0115	0.1344	0.4163	952649
rs7659468	G	T	-0.0287	0.0037	1.43e-14	0.4984	0.0053	0.0078	0.482	0.4928	955741
rs7664347	C	T	-0.0234	0.0041	9.517e-09	0.6601	-0.0023	0.0081	0.6409	0.7727	958995
rs76675804	C	T	-0.1208	0.0074	1.29e-59	0.0941	0.0061	0.0136	0.0921	0.6548	955742
rs7674402	G	A	-0.0523	0.0064	3.978e-16	0.7719	0.0167	0.0215	0.9592	0.4393	956498
rs76789970	T	C	0.0387	0.006	9.238e-11	0.8868	-0.0098	0.013	0.1019	0.4532	956827
rs76895963	G	T	-0.4223	0.0202	1.2e-96	0.019	0.0451	0.0341	0.0203	0.1858	894618
rs7732130	G	A	0.0554	0.0047	2.208e-32	0.2954	0.0151	0.0087	0.2896	0.0832	957783
rs7742292	C	T	0.0261	0.004	5.058e-11	0.4778	0.0024	0.008	0.4122	0.7631	953763
rs77424687	C	T	0.0274	0.0046	2.895e-09	0.6959	0.0328	0.01	0.8064	0.001002	955705
rs7752666	C	T	0.0305	0.0043	1.661e-12	0.7047	-0.0142	0.0088	0.6733	0.1071	920087
rs7758002	G	T	-0.0317	0.0039	4.632e-16	0.5238	0.0068	0.0079	0.5736	0.3899	955745
rs7758115	G	A	-0.0232	0.0039	3.693e-09	0.4997	0.0002	0.0078	0.4986	0.982	960948
rs7787720	C	T	-0.0285	0.0039	3.751e-13	0.5594	0.0153	0.008	0.5647	0.0562	955712
rs7895872	T	G	0.0306	0.0041	1.282e-13	0.3225	-0.0004	0.0091	0.7469	0.9615	953732
rs79090772	C	T	-0.0728	0.0066	1.295e-28	0.0971	-0.0145	0.014	0.0902	0.3003	950403
rs79310463	C	T	-0.05	0.0053	7.213e-21	0.8257	-0.0074	0.0113	0.8525	0.513	956707
rs7941510	C	A	0.0353	0.0042	1.869e-17	0.6493	-0.0092	0.0088	0.7302	0.2963	958798
rs79598313	C	T	-0.0867	0.0148	4.902e-09	0.9767	-0.0242	0.0276	0.9755	0.3793	949461
rs7970687	C	T	-0.026	0.0039	2.769e-11	0.4978	-0.0146	0.0079	0.4447	0.06555	961206
rs7991679	T	A	0.0274	0.0048	1.118e-08	0.7562	0.0074	0.0121	0.8293	0.5432	590993
rs8010382	G	A	0.0266	0.0038	3.016e-12	0.4692	0.0049	0.0092	0.4552	0.5978	591057
rs80196932	C	T	-0.0479	0.0053	9.733e-20	0.1828	-0.0046	0.011	0.1525	0.6774	955645
rs8043085	G	T	-0.0407	0.0042	9.057e-22	0.6975	-0.0161	0.0095	0.7739	0.08905	962005
rs8054556	G	A	-0.0317	0.0039	1.848e-16	0.5699	-0.0141	0.0078	0.5432	0.07291	958782
rs8056890	G	A	-0.0295	0.0042	1.541e-12	0.6775	-0.0137	0.0082	0.6332	0.09438	954953
rs8061528	C	T	-0.0346	0.0045	2.564e-14	0.7573	-0.0026	0.0099	0.799	0.7885	953671
rs8071043	C	T	0.0465	0.0041	5.352e-30	0.3318	0.0026	0.0084	0.3227	0.76	956703
rs8107527	G	A	-0.0542	0.004	4.229e-41	0.6245	0.0235	0.0086	0.6999	0.006312	958807
rs8188241	G	A	0.0232	0.0041	1.527e-08	0.5955	0.0021	0.0084	0.574	0.8067	917709
rs8192675	C	T	-0.0452	0.0042	3.849e-27	0.3167	0.0042	0.0086	0.2842	0.6226	959008
rs827237	T	C	0.0294	0.0053	2.533e-08	0.8128	0.0048	0.0098	0.2077	0.6224	956661
rs838720	G	C	0.034	0.0039	4.309e-18	0.384	-0.0057	0.0081	0.3786	0.48	955730
rs853866	T	A	0.0244	0.0044	2.722e-08	0.6109	0.0157	0.008	0.58	0.05002	953643
rs858519	C	T	-0.024	0.004	1.276e-09	0.5049	-0.0006	0.008	0.5568	0.944	956757
rs860262	C	A	0.0747	0.0039	2.924e-82	0.5683	-0.0104	0.0077	0.5139	0.1809	958811
rs884847	G	A	-0.0293	0.005	3.52e-09	0.8026	0.0009	0.0098	0.7996	0.928	962046
rs893617	C	T	0.0537	0.0041	2.132e-38	0.2813	-0.0179	0.0087	0.2825	0.03967	964052
rs917195	C	T	0.0424	0.0046	1.489e-20	0.7224	0.0051	0.0095	0.7661	0.5903	956292
rs924753	G	A	0.0263	0.0039	1.15e-11	0.4649	0.0079	0.008	0.4024	0.3255	950654
rs9308614	G	A	-0.057	0.0058	4.511e-23	0.1338	0.0131	0.0112	0.1473	0.2437	950638
rs9316500	G	T	-0.0401	0.0041	1.028e-22	0.3528	-0.0053	0.0087	0.2833	0.5457	955712
rs9319943	C	T	-0.0308	0.0048	1.503e-10	0.2071	-0.0149	0.0098	0.2076	0.1297	955678
rs9358912	G	T	0.0249	0.0045	2.275e-08	0.6514	-0.0004	0.0087	0.7044	0.9605	950395
rs9370243	G	T	-0.0394	0.0061	1.027e-10	0.8339	-0.0522	0.0145	0.9184	0.0003042	950670
rs9379084	G	A	0.0715	0.0062	5.306e-31	0.843	-0.0012	0.0127	0.8833	0.9276	959014
rs9384	G	T	0.0404	0.0041	8.364e-23	0.6566	-0.0125	0.0081	0.6194	0.121	962030
rs9390022	C	T	-0.0306	0.0041	4.999e-14	0.3361	-0.0019	0.0081	0.3738	0.8166	952649
rs9411425	G	T	0.0236	0.004	4.803e-09	0.3531	0.0014	0.0097	0.322	0.886	594342
rs9438610	G	A	-0.0313	0.0051	6.737e-10	0.1966	-0.0099	0.0104	0.1712	0.3413	955750
rs9449295	C	T	0.0216	0.0039	4.028e-08	0.5169	0.0262	0.0079	0.5407	0.0008996	955662
rs945187	G	A	0.031	0.0039	8.236e-16	0.4199	-0.0072	0.008	0.4126	0.3624	958792
rs9472139	G	C	-0.0376	0.0044	1.441e-17	0.7397	-0.0054	0.0086	0.7131	0.5338	953701
rs9479	G	A	0.0271	0.0037	4.004e-13	0.5244	0.0087	0.0078	0.5	0.2657	962069
rs9515905	G	A	-0.0472	0.0044	2.056e-27	0.2606	-0.0042	0.009	0.25	0.6437	964053
rs9560114	T	A	-0.0259	0.0047	3.301e-08	0.2435	-0.0089	0.009	0.2639	0.3223	961864
rs9564268	C	T	-0.0243	0.004	7.67e-10	0.544	-0.014	0.008	0.6133	0.08149	963866
rs9568868	G	T	-0.035	0.0053	5.821e-11	0.8396	-0.0414	0.0116	0.8717	0.0003736	964051
rs9587811	C	A	0.0248	0.0038	4.909e-11	0.5464	0.023	0.0079	0.5861	0.003723	958759
rs978444	G	T	0.0229	0.0039	3.524e-09	0.4136	0.0046	0.0079	0.4436	0.5655	948391
rs9814945	C	T	-0.0316	0.0048	3.303e-11	0.7128	-0.0147	0.009	0.7408	0.1001	955747
rs9857204	G	A	-0.0272	0.0043	2.173e-10	0.7085	0.0021	0.0085	0.6913	0.8014	955751
rs9859406	G	A	-0.1117	0.004	2.01e-169	0.6476	-0.0243	0.0084	0.6877	0.003859	958884
rs9869477	G	A	0.0226	0.0038	4.121e-09	0.562	0.0041	0.0078	0.5317	0.6007	960983
rs9872347	C	T	0.0318	0.0042	5.438e-14	0.6736	-0.0176	0.0084	0.6704	0.03735	949901
rs9873519	C	T	-0.0373	0.0038	2.531e-22	0.5288	0.0078	0.0078	0.4571	0.3185	952650
rs9913225	G	A	0.0262	0.004	5.42e-11	0.3742	0.0136	0.008	0.4131	0.08886	953732
rs9927842	C	T	-0.0307	0.005	6.969e-10	0.7886	-0.0093	0.0118	0.8596	0.4321	927194
rs993380	G	A	-0.0272	0.0039	3.695e-12	0.6352	-0.0108	0.0084	0.6639	0.194	954331
rs9937296	C	T	0.0445	0.007	2.347e-10	0.7708	0.0208	0.0128	0.8519	0.1049	910373
rs9958640	G	A	-0.0236	0.0042	2.283e-08	0.6007	-0.0027	0.0092	0.6868	0.771	918047
rs9991328	C	T	-0.0227	0.0038	2.369e-09	0.4796	-0.0013	0.0079	0.5388	0.8649	952650

## Sheet: Supplementary Table 4
Supplementary Table 4. Association between T2D and Heart Failure using variants from the DIAGRAM GWAS (Mahajan et al. Nat Genet 2018)
SNP	effect_allele	other_allele	beta.t2d	set2d	pval.t2d	beta.hf	se.hf	eaf.hf	pval.hf	samplesize.hf
rs1005752	A	C	0.076961	0.00765306	4.31132e-24	0.0126	0.0087	0.7161	0.146	964012
rs10096633	C	T	0.0676586	0.0102041	1.67222e-11	0.037	0.0124	0.8816	0.002835	950083
rs10097617	T	C	0.0392207	0.00765306	1.48895e-07	0.007	0.0078	0.4976	0.3682	958809
rs10193538	T	G	0.0392207	0.00765306	1.48895e-07	0.0082	0.008	0.6073	0.3082	955740
rs10195252	T	C	0.0676586	0.00510204	1.94587e-40	0.0024	0.008	0.5756	0.763	950669
rs10228066	T	C	0.0676586	0.00765306	4.75475e-19	0.0055	0.0079	0.53	0.4855	956742
rs10406431	A	G	0.0487902	0.00510204	5.72668e-22	-0.0049	0.008	0.5612	0.5375	958307
rs1042725	T	C	0.0487902	0.00765306	9.13334e-11	0.0058	0.0078	0.4856	0.4603	953732
rs1061810	A	C	0.0487902	0.00765306	9.13334e-11	0.0277	0.0086	0.2839	0.001342	963986
rs10750397	A	G	0.0487902	0.00765306	9.13334e-11	0.0016	0.0087	0.2846	0.856	953732
rs10757283	T	C	0.10436	0.0102041	7.48311e-25	0.0172	0.008	0.433	0.0324	929512
rs10811660	G	A	0.239017	0.0127551	1.19198e-78	-0.0222	0.0105	0.827	0.03523	952249
rs10842994	C	T	0.076961	0.00765306	4.31132e-24	0.0073	0.0101	0.8045	0.4685	953732
rs10882101	T	C	0.0582689	0.0102041	5.63711e-09	0.003	0.008	0.5794	0.7118	949512
rs10893829	T	C	0.0582689	0.0102041	5.63711e-09	-0.0048	0.0112	0.8575	0.6716	964051
rs10938398	A	G	0.0487902	0.00765306	9.13334e-11	0.0389	0.008	0.4258	1.194e-06	953665
rs10954772	T	C	0.0392207	0.00765306	1.48895e-07	0.0141	0.0085	0.3229	0.09556	958756
rs10974438	C	A	0.0487902	0.00765306	9.13334e-11	0.0083	0.0083	0.3519	0.3204	952543
rs11042596	G	T	0.0392207	0.00510204	7.516e-15	0.0072	0.0086	0.6737	0.4003	956485
rs11063028	C	T	0.0582689	0.00765306	1.33072e-14	-0.0004	0.0102	0.1788	0.9726	964027
rs11070332	A	G	0.0487902	0.00510204	5.72668e-22	0.0081	0.0082	0.3624	0.3222	958732
rs11202627	T	C	0.0582689	0.0102041	5.63711e-09	-0.0169	0.0109	0.1514	0.1219	964036
rs11257655	T	C	0.0861777	0.00765306	1.02733e-29	0.0041	0.0095	0.2203	0.6701	955712
rs1127215	C	T	0.0487902	0.00510204	5.72668e-22	0.0017	0.008	0.5809	0.8309	950638
rs113414093	A	G	0.113329	0.0229592	3.98514e-07	0.0051	0.0197	0.0712	0.7974	877118
rs11496066	T	C	0.076961	0.0153061	2.47654e-07	-0.0074	0.0102	0.8207	0.4675	962061
rs115505614	T	C	0.173953	0.0178571	1.00399e-22	0.0341	0.019	0.0508	0.07336	940149
rs11680058	A	G	0.0582689	0.0102041	5.63711e-09	0.001	0.0132	0.8515	0.9417	902015
rs11699802	C	T	0.0392207	0.00765306	1.48895e-07	0.0185	0.0079	0.5357	0.01918	956800
rs117001013	C	T	0.0676586	0.0127551	5.65103e-08	0.0048	0.0138	0.9048	0.731	956812
rs11708067	A	G	0.0861777	0.00765306	1.02733e-29	-0.0041	0.0095	0.7785	0.6656	950670
rs11709077	G	A	0.131028	0.0127551	4.68154e-25	0.0056	0.0118	0.8729	0.6328	959002
rs117483894	G	A	0.0953102	0.0178571	4.71522e-08	0.0104	0.0203	0.0399	0.6098	956287
rs11759026	G	A	0.0676586	0.00765306	4.75475e-19	-0.0037	0.0094	0.2326	0.6921	953744
rs11820019	T	C	0.14842	0.0229592	5.08119e-11	0.0588	0.0267	0.9723	0.02734	900665
rs11842871	G	T	0.0392207	0.00765306	1.48895e-07	-0.0075	0.0089	0.7277	0.3993	952813
rs11926707	C	T	0.239017	0.0535714	4.06657e-06	-0.0002	0.0081	0.6306	0.9842	960563
rs12001437	C	T	0.0392207	0.00765306	1.48895e-07	-0.0046	0.0081	0.371	0.5709	958748
rs12140153	G	T	0.0676586	0.0127551	5.65103e-08	0.0081	0.0138	0.9027	0.5557	945194
rs12454712	T	C	0.0487902	0.00510204	5.72668e-22	0.0105	0.0085	0.6057	0.2171	942930
rs1260326	C	T	0.0676586	0.00510204	1.94587e-40	-0.0087	0.0081	0.6127	0.2797	952650
rs12640250	C	A	0.0392207	0.00510204	7.516e-15	0.0193	0.0088	0.7164	0.02806	953722
rs12642790	A	G	0.0392207	0.00765306	1.48895e-07	0.0104	0.0083	0.336	0.2083	955736
rs12719778	T	C	0.0392207	0.00510204	7.516e-15	0	0.0079	0.5411	0.9999	954953
rs12811407	A	G	0.0487902	0.00765306	9.13334e-11	0.0021	0.0084	0.3357	0.7994	952196
rs12910825	G	A	0.0487902	0.00765306	9.13334e-11	0.0156	0.0081	0.3589	0.05457	963716
rs1296328	A	C	0.0392207	0.00765306	1.48895e-07	0.01	0.008	0.4473	0.2137	950449
rs13024606	T	C	0.0861777	0.0178571	6.96684e-07	0.0115	0.0189	0.0495	0.5432	956823
rs13041756	C	T	0.0582689	0.0102041	5.63711e-09	0.0002	0.0126	0.1106	0.9873	958760
rs13065698	A	G	0.0487902	0.00765306	9.13334e-11	0.0015	0.0081	0.6098	0.8558	953725
rs13085136	C	T	0.076961	0.0127551	8.01011e-10	0.0235	0.016	0.9277	0.1421	953611
rs1316776	C	A	0.0487902	0.00765306	9.13334e-11	0.0039	0.0082	0.6428	0.6313	958765
rs13262861	C	A	0.0676586	0.0102041	1.67222e-11	-0.0052	0.0123	0.8208	0.6693	588906
rs13426680	A	G	0.0861777	0.0127551	7.07648e-12	0.0101	0.0162	0.9376	0.5312	955731
rs1359790	G	A	0.0861777	0.00765306	1.02733e-29	0.0032	0.0088	0.7184	0.7124	953732
rs13737	G	T	0.0487902	0.00765306	9.13334e-11	0.0019	0.0093	0.7682	0.8356	962056
rs1412234	C	T	0.0392207	0.00765306	1.48895e-07	0.0205	0.0083	0.3253	0.01356	963973
rs141521721	A	C	0.122218	0.0229592	5.09628e-08	-0.043	0.0277	0.0236	0.1211	931076
rs1421085	C	T	0.122218	0.00765306	1.03773e-57	0.0409	0.008	0.415	3.24e-07	953732
rs1426371	G	A	0.0487902	0.00765306	9.13334e-11	-0.013	0.0091	0.7358	0.1537	954021
rs145678014	G	T	0.10436	0.0178571	2.54564e-09	-0.0026	0.0203	0.9577	0.8995	954295
rs145904381	T	C	0.173953	0.0357143	5.56039e-07	-0.0359	0.0359	0.9824	0.3178	911152
rs1493694	T	C	0.0861777	0.0102041	1.51485e-17	0.004	0.0128	0.1109	0.7527	946945
rs1531583	T	G	0.122218	0.0178571	3.84556e-12	0.0234	0.0188	0.0506	0.2124	946316
rs1561927	C	T	0.0392207	0.00765306	1.48895e-07	-0.009	0.009	0.2652	0.3137	955712
rs1562396	G	A	0.0582689	0.00765306	1.33072e-14	0.023	0.0087	0.313	0.008382	949633
rs1580278	C	A	0.0392207	0.00510204	7.516e-15	0.0023	0.008	0.473	0.778	944726
rs1641523	C	T	0.0487902	0.00765306	9.13334e-11	-0.0054	0.008	0.4336	0.4947	961853
rs17013314	G	A	0.10436	0.0204082	1.58004e-07	0.0407	0.022	0.0348	0.06476	953236
rs1708302	C	T	0.0953102	0.00765306	6.66176e-36	-0.0109	0.0078	0.5161	0.1631	956731
rs17168486	T	C	0.0676586	0.00765306	4.75475e-19	0.0129	0.0101	0.1897	0.1991	955651
rs17250977	G	A	0.113329	0.0178571	1.10201e-10	-0.0155	0.0256	0.0334	0.5438	905076
rs17261179	T	C	0.0392207	0.00765306	1.48895e-07	-0.0061	0.0078	0.5187	0.4344	958792
rs17522122	T	G	0.0392207	0.00510204	7.516e-15	0.0095	0.0079	0.479	0.2275	963821
rs17689007	G	A	0.0392207	0.00510204	7.516e-15	0.0054	0.0081	0.53	0.503	956706
rs177045	G	A	0.0676586	0.00765306	4.75475e-19	0.0049	0.0087	0.3104	0.5741	946838
rs17772814	G	A	0.076961	0.0153061	2.47654e-07	-0.0164	0.0161	0.9099	0.3092	900394
rs17791513	A	G	0.0953102	0.0127551	3.93971e-14	-0.0329	0.0156	0.9286	0.03519	953672
rs17802463	G	T	0.0392207	0.00510204	7.516e-15	0.0162	0.0089	0.7355	0.06839	960986
rs17819328	G	T	0.0582689	0.00765306	1.33072e-14	0.0006	0.0079	0.4251	0.9365	958943
rs1783541	T	C	0.0582689	0.00765306	1.33072e-14	-0.0035	0.0102	0.1961	0.7312	948488
rs1800574	T	C	0.131028	0.0229592	5.74895e-09	0.0244	0.0247	0.0289	0.3224	945972
rs1800961	T	C	0.165514	0.0204082	2.52667e-16	0.0097	0.0215	0.0373	0.6509	941857
rs1801645	C	T	0.0392207	0.00765306	1.48895e-07	0.0056	0.0094	0.2899	0.5479	915345
rs2066827	G	T	0.0487902	0.00765306	9.13334e-11	0.0155	0.0099	0.2397	0.1163	942930
rs2102278	G	A	0.0392207	0.00765306	1.48895e-07	0.0174	0.0085	0.3197	0.04029	953638
rs2197973	T	C	0.0392207	0.00765306	1.48895e-07	-0.0025	0.0078	0.5445	0.7468	964044
rs2237895	C	A	0.113329	0.00765306	6.47542e-50	0.0211	0.0081	0.4306	0.009391	947539
rs2237897	C	T	0.207014	0.0204082	1.76737e-24	0.028	0.0196	0.9518	0.1526	955796
rs2238689	C	T	0.0392207	0.00510204	7.516e-15	-0.0197	0.0081	0.4232	0.01423	956762
rs2249105	A	G	0.0953102	0.0127551	3.93971e-14	0.0039	0.0081	0.6358	0.6306	952650
rs2268078	A	G	0.0392207	0.00765306	1.48895e-07	-0.0006	0.0083	0.6602	0.9397	958742
rs2272163	C	A	0.0392207	0.00765306	1.48895e-07	0.0168	0.0081	0.6249	0.03862	960899
rs2280141	T	G	0.0487902	0.00765306	9.13334e-11	0.0007	0.0079	0.5041	0.9314	955707
rs2283220	A	G	0.0487902	0.00765306	9.13334e-11	-0.005	0.0086	0.6855	0.5622	956713
rs2307111	T	C	0.0487902	0.00765306	9.13334e-11	0.0121	0.0081	0.6102	0.1328	955712
rs231349	T	C	0.0676586	0.0127551	5.65103e-08	-0.0226	0.0134	0.1006	0.09148	956929
rs231361	A	G	0.076961	0.00765306	4.31132e-24	0.0027	0.0091	0.262	0.763	954398
rs234853	G	A	0.076961	0.0102041	2.31087e-14	-0.0096	0.0092	0.2461	0.2954	959985
rs243024	A	G	0.0582689	0.00510204	1.64774e-30	0.0047	0.0079	0.4628	0.5533	953591
rs2431115	A	G	0.0392207	0.00765306	1.48895e-07	-0.0085	0.0081	0.4008	0.2935	959884
rs2456530	T	C	0.0582689	0.0102041	5.63711e-09	0.0111	0.0118	0.1283	0.3453	963928
rs2581787	T	G	0.0392207	0.00765306	1.48895e-07	0.0164	0.0079	0.5679	0.03775	955725
rs2642588	G	T	0.0487902	0.00765306	9.13334e-11	0.008	0.0086	0.7049	0.3542	955712
rs2767036	C	A	0.0392207	0.00765306	1.48895e-07	0.0158	0.0086	0.2873	0.06641	964056
rs2796441	G	A	0.0676586	0.00765306	4.75475e-19	-0.0109	0.0081	0.5977	0.178	953731
rs279744	C	A	0.0392207	0.00510204	7.516e-15	0.0134	0.0085	0.6861	0.1157	953676
rs2800733	A	G	0.0487902	0.00765306	9.13334e-11	0.0055	0.0088	0.7168	0.531	951648
rs28505901	G	A	0.0861777	0.0102041	1.51485e-17	0.0142	0.0099	0.7543	0.1507	918179
rs2872246	A	C	0.0392207	0.00765306	1.48895e-07	0.0041	0.0078	0.4639	0.5942	955712
rs28819812	C	A	0.0392207	0.00765306	1.48895e-07	-0.0079	0.01	0.6807	0.4302	579120
rs291367	G	A	0.0392207	0.00765306	1.48895e-07	-0.0054	0.0093	0.6319	0.5666	588013
rs2925979	T	C	0.0487902	0.00765306	9.13334e-11	-0.0083	0.0086	0.2981	0.3334	955712
rs2972144	G	A	0.0953102	0.00765306	6.66176e-36	0.0032	0.0081	0.6344	0.6906	960046
rs3111316	A	G	0.0487902	0.00765306	9.13334e-11	-0.0174	0.008	0.5831	0.02976	956821
rs3217792	C	T	0.113329	0.0127551	3.19693e-19	0.0069	0.0153	0.9108	0.6522	943232
rs3217860	G	A	0.0487902	0.00765306	9.13334e-11	-0.0093	0.0092	0.2621	0.3117	951423
rs329122	A	G	0.0392207	0.00510204	7.516e-15	0.0087	0.0079	0.4312	0.2683	962073
rs340874	C	T	0.0676586	0.00765306	4.75475e-19	0.0052	0.008	0.5541	0.5111	950670
rs34298980	T	C	0.0392207	0.00510204	7.516e-15	0.0112	0.0084	0.4985	0.1812	952566
rs34584161	A	G	0.0487902	0.00765306	9.13334e-11	0.0032	0.0092	0.7565	0.7312	956731
rs34715063	C	T	0.0953102	0.0127551	3.93971e-14	-0.0023	0.0125	0.1229	0.8536	956429
rs348330	G	A	0.0487902	0.00765306	9.13334e-11	0.014	0.0083	0.3566	0.09244	953055
rs34855922	A	G	0.0487902	0.00765306	9.13334e-11	0.0095	0.009	0.7134	0.2918	955839
rs34965774	A	G	0.0582689	0.0102041	5.63711e-09	0.0031	0.0111	0.1529	0.777	956700
rs35352848	T	C	0.0676586	0.0102041	1.67222e-11	-0.0079	0.0095	0.7821	0.407	955749
rs35895680	C	A	0.0582689	0.00765306	1.33072e-14	0.0293	0.0086	0.6828	0.0006664	956590
rs35913461	C	T	0.0582689	0.0102041	5.63711e-09	0.0348	0.0107	0.8311	0.00115	944898
rs35999103	T	C	0.0487902	0.0102041	8.70238e-07	0.0047	0.0106	0.1637	0.6567	955736
rs362307	T	C	0.076961	0.0127551	8.01011e-10	0.0134	0.0146	0.0822	0.3558	953606
rs3751837	T	C	0.0392207	0.00765306	1.48895e-07	0.0016	0.0095	0.2199	0.8673	958699
rs3768321	T	G	0.0861777	0.00765306	1.02733e-29	0.0041	0.0098	0.2001	0.6783	955677
rs3772071	T	C	0.0487902	0.00765306	9.13334e-11	0.0014	0.0087	0.722	0.8732	960982
rs3774723	G	A	0.0676586	0.0102041	1.67222e-11	-0.0044	0.0109	0.8417	0.6826	958962
rs3798519	C	A	0.0582689	0.0102041	5.63711e-09	0.0217	0.01	0.1887	0.02953	954785
rs3802177	G	A	0.10436	0.00765306	1.21679e-42	0.006	0.0085	0.6775	0.478	949966
rs3810291	A	G	0.0487902	0.00765306	9.13334e-11	0.017	0.0086	0.6692	0.04663	949966
rs3811978	G	A	0.0582689	0.00765306	1.33072e-14	-0.0075	0.0105	0.1646	0.477	958776
rs3845281	G	A	0.076961	0.0102041	2.31087e-14	0.0122	0.0134	0.9029	0.3626	963952
rs3887925	T	C	0.0676586	0.00765306	4.75475e-19	-0.0093	0.0079	0.5344	0.2405	952650
rs39328	T	C	0.0392207	0.00765306	1.48895e-07	0.0014	0.0078	0.4376	0.858	964038
rs3934712	C	T	0.0487902	0.0102041	8.70238e-07	-0.0097	0.0097	0.2051	0.3169	963969
rs4238013	C	T	0.0582689	0.00765306	1.33072e-14	0.005	0.0103	0.2088	0.6247	947486
rs4281707	G	A	0.0392207	0.00510204	7.516e-15	0.0037	0.0079	0.5499	0.6381	958800
rs429358	T	C	0.076961	0.0102041	2.31087e-14	0.0227	0.0112	0.8429	0.0418	953025
rs4457053	G	A	0.0582689	0.00765306	1.33072e-14	0.0102	0.0088	0.292	0.2429	953592
rs465002	T	C	0.10436	0.00765306	1.21679e-42	0.0058	0.0089	0.738	0.5196	956819
rs4686471	C	T	0.0582689	0.00765306	1.33072e-14	0.0178	0.008	0.6083	0.02669	955660
rs4688760	T	C	0.0392207	0.00765306	1.48895e-07	0.0099	0.0085	0.6849	0.2452	953642
rs4709746	C	T	0.0582689	0.0102041	5.63711e-09	0.0018	0.0118	0.869	0.8772	955656
rs474513	A	G	0.0392207	0.00510204	7.516e-15	-0.0023	0.0079	0.5155	0.7694	950642
rs4804833	A	G	0.0487902	0.00765306	9.13334e-11	0.0121	0.0082	0.3896	0.1383	955711
rs4810426	T	C	0.0861777	0.0127551	7.07648e-12	-0.0022	0.0131	0.1071	0.8657	958689
rs4923543	A	G	0.0392207	0.00765306	1.48895e-07	0.0285	0.0083	0.3309	0.0005761	964052
rs4925109	A	G	0.0487902	0.00765306	9.13334e-11	0.0167	0.0084	0.3211	0.04742	955711
rs4929965	A	G	0.0676586	0.00765306	4.75475e-19	0.0026	0.0082	0.3794	0.7548	953036
rs4932265	T	C	0.0676586	0.00765306	4.75475e-19	-0.023	0.0089	0.2694	0.009763	962010
rs4946812	G	A	0.0392207	0.00510204	7.516e-15	-0.0161	0.0088	0.6723	0.06743	914145
rs4976033	G	A	0.0487902	0.00765306	9.13334e-11	0.02	0.0082	0.4107	0.01497	953732
rs4977213	C	T	0.0487902	0.00765306	9.13334e-11	-0.0042	0.0081	0.3685	0.6056	958812
rs505922	C	T	0.0487902	0.00765306	9.13334e-11	0.0396	0.0085	0.3313	2.748e-06	948487
rs5213	C	T	0.0676586	0.00765306	4.75475e-19	0.0123	0.0083	0.3688	0.1366	949829
rs539515	C	A	0.0487902	0.00765306	9.13334e-11	-0.0016	0.0098	0.196	0.8707	955751
rs55653563	A	C	0.0392207	0.00765306	1.48895e-07	-0.0093	0.0089	0.7331	0.2931	958755
rs56337234	C	T	0.0582689	0.00765306	1.33072e-14	-0.0237	0.0084	0.4974	0.004607	918705
rs57235767	C	T	0.0392207	0.00765306	1.48895e-07	0.0163	0.0086	0.703	0.0589	958794
rs5758223	A	G	0.0392207	0.00510204	7.516e-15	0.0232	0.0087	0.7126	0.007761	955671
rs576674	G	A	0.0487902	0.00765306	9.13334e-11	-0.0111	0.0106	0.1695	0.2949	953732
rs58432198	C	T	0.0676586	0.0102041	1.67222e-11	0.0087	0.0124	0.8801	0.4825	950319
rs58730668	T	C	0.0676586	0.0102041	1.67222e-11	0.0046	0.0113	0.8599	0.682	953726
rs59944054	A	G	0.0582689	0.0102041	5.63711e-09	-0.0029	0.0094	0.2345	0.7564	952196
rs601945	G	A	0.0582689	0.0102041	5.63711e-09	-0.0021	0.0111	0.1731	0.8532	911776
rs60276348	T	C	0.0487902	0.0102041	8.70238e-07	-0.0082	0.0119	0.1372	0.4918	953816
rs6063048	G	A	0.0487902	0.00765306	9.13334e-11	0.0003	0.0087	0.7216	0.9758	964044
rs62007683	G	T	0.0392207	0.00765306	1.48895e-07	0.0224	0.0082	0.6558	0.006553	958807
rs62080313	C	T	0.0582689	0.0102041	5.63711e-09	0.0177	0.0122	0.1171	0.1466	958807
rs62107261	T	C	0.113329	0.0178571	1.10201e-10	0.0752	0.0215	0.9542	0.0004727	900860
rs62492368	A	G	0.0487902	0.00765306	9.13334e-11	-0.0239	0.0086	0.3043	0.005476	956811
rs6458354	C	T	0.0487902	0.00765306	9.13334e-11	0.0041	0.0086	0.2889	0.6384	953691
rs649961	T	C	0.0392207	0.00510204	7.516e-15	0.0042	0.0078	0.4692	0.5881	960984
rs6518681	G	A	0.0861777	0.0127551	7.07648e-12	0.0093	0.0142	0.9146	0.5126	958682
rs6545714	G	A	0.0392207	0.00765306	1.48895e-07	0.0113	0.008	0.3883	0.1572	960988
rs6600191	T	C	0.0582689	0.00765306	1.33072e-14	-0.0035	0.0107	0.8306	0.7475	950969
rs6708643	A	G	0.0392207	0.00765306	1.48895e-07	-0.0039	0.0079	0.4939	0.6227	955523
rs67232546	T	C	0.0582689	0.00765306	1.33072e-14	-0.0054	0.0099	0.2007	0.5852	956668
rs6821438	A	G	0.0392207	0.00765306	1.48895e-07	-0.0069	0.0078	0.5354	0.3769	955739
rs6884702	G	A	0.0392207	0.00765306	1.48895e-07	-0.0042	0.0081	0.3918	0.6072	958808
rs6976111	A	C	0.0392207	0.00765306	1.48895e-07	0.0051	0.0098	0.3223	0.6025	594253
rs7022807	G	A	0.0392207	0.00510204	7.516e-15	-0.0089	0.008	0.4056	0.2654	958803
rs702634	A	G	0.0487902	0.00765306	9.13334e-11	-0.0157	0.0085	0.686	0.06521	953732
rs7115753	A	G	0.0392207	0.00510204	7.516e-15	0.0038	0.008	0.4567	0.6293	956632
rs7124681	A	C	0.0392207	0.00510204	7.516e-15	0.0121	0.0081	0.4105	0.1338	950364
rs71372253	C	T	0.076961	0.0127551	8.01011e-10	-0.0026	0.0178	0.0595	0.8855	940396
rs7178762	C	T	0.0392207	0.00510204	7.516e-15	0.0185	0.0079	0.4649	0.01916	955711
rs718314	G	A	0.0487902	0.00765306	9.13334e-11	-0.0082	0.009	0.2592	0.3608	955712
rs7240767	C	T	0.0392207	0.00765306	1.48895e-07	-0.0095	0.0082	0.3739	0.2472	953704
rs7249758	A	G	0.0487902	0.0102041	8.70238e-07	0.0157	0.0098	0.2052	0.1085	956805
rs72631105	A	G	0.0582689	0.0102041	5.63711e-09	-0.0096	0.0103	0.2047	0.3517	956276
rs72802342	C	A	0.157004	0.0153061	5.4708e-25	0.0267	0.0154	0.9245	0.08375	956720
rs72926932	C	A	0.0861777	0.0127551	7.07648e-12	-0.0383	0.0141	0.0851	0.006603	958809
rs73226260	G	A	0.122218	0.0204082	1.05786e-09	0.0394	0.0269	0.9671	0.1425	586567
rs738408	T	C	0.0487902	0.0102041	8.70238e-07	-0.0095	0.0094	0.2248	0.3095	964054
rs74452128	C	A	0.139762	0.0255102	2.1427e-08	0.0321	0.0262	0.9723	0.2214	954191
rs74653713	C	A	0.0953102	0.0178571	4.71522e-08	-0.0053	0.0191	0.9527	0.7824	953231
rs75253922	C	T	0.0487902	0.00765306	9.13334e-11	-0.0032	0.0101	0.1867	0.7517	958730
rs76263492	T	G	0.0861777	0.0178571	6.96684e-07	0.044	0.0201	0.0438	0.0285	947476
rs7645517	A	G	0.076961	0.0153061	2.47654e-07	0.0004	0.0175	0.0575	0.9814	946674
rs76549217	T	C	0.131028	0.0229592	5.74895e-09	0.0149	0.0292	0.0268	0.61	897316
rs76895963	T	G	0.482426	0.0433673	4.78411e-29	-0.0451	0.0341	0.9797	0.1858	894618
rs77136196	T	C	0.10436	0.0229592	2.74079e-06	0.0101	0.0212	0.0391	0.6352	953697
rs7719891	G	A	0.0392207	0.00765306	1.48895e-07	0.01	0.009	0.2596	0.2642	958774
rs77464186	A	C	0.10436	0.0102041	7.48311e-25	-0.0145	0.0105	0.8298	0.1696	956720
rs7756992	G	A	0.139762	0.0102041	5.31442e-43	0.0007	0.0089	0.2694	0.9335	952649
rs77864822	A	G	0.076961	0.0153061	2.47654e-07	-0.0185	0.0157	0.9295	0.2372	958688
rs78020297	A	G	0.0861777	0.0153061	8.99606e-09	0.0151	0.0181	0.052	0.4033	955858
rs7867635	C	T	0.0392207	0.00765306	1.48895e-07	0.0077	0.0082	0.4118	0.3456	953176
rs7903146	T	C	0.314811	0.0102041	2.67805e-209	0.0033	0.0088	0.2878	0.7025	953732
rs7918400	T	C	0.0582689	0.00765306	1.33072e-14	-0.0048	0.0079	0.4773	0.5403	956746
rs7987740	T	C	0.0392207	0.00765306	1.48895e-07	0.0221	0.008	0.6077	0.005745	958767
rs8010382	G	A	0.0392207	0.00510204	7.516e-15	0.0049	0.0092	0.4552	0.5978	591057
rs8017808	G	T	0.0392207	0.00765306	1.48895e-07	-0.0138	0.0088	0.7314	0.1198	961999
rs8032939	C	T	0.0582689	0.00765306	1.33072e-14	0.0174	0.0091	0.2456	0.05537	964043
rs8046545	G	A	0.0392207	0.00765306	1.48895e-07	0.0115	0.0096	0.3563	0.2289	585154
rs862320	C	T	0.0392207	0.00765306	1.48895e-07	0.0265	0.0079	0.5734	0.0008419	958808
rs878521	A	G	0.0582689	0.00765306	1.33072e-14	0.0165	0.0093	0.2405	0.07669	958757
rs917195	C	T	0.0487902	0.00765306	9.13334e-11	0.0051	0.0095	0.7661	0.5903	956292
rs9379084	G	A	0.10436	0.0127551	1.39788e-16	-0.0012	0.0127	0.8833	0.9276	959014
rs9494624	A	G	0.0392207	0.00765306	1.48895e-07	0.0114	0.0086	0.294	0.1817	960973
rs9505097	C	T	0.0487902	0.0102041	8.70238e-07	0.0186	0.0098	0.7956	0.05692	958869
rs9537803	C	T	0.0392207	0.00765306	1.48895e-07	0.0227	0.0087	0.2818	0.009172	958808
rs9687832	A	G	0.076961	0.0102041	2.31087e-14	0.0276	0.01	0.193	0.005633	956737
rs9860730	A	G	0.0582689	0.00765306	1.33072e-14	0.0103	0.0086	0.7049	0.2304	956946
rs9873618	G	A	0.0676586	0.00765306	4.75475e-19	-0.0059	0.0086	0.714	0.4916	955715
rs9957145	G	A	0.0487902	0.0102041	8.70238e-07	0.0139	0.0104	0.8251	0.1808	964046

## Sheet: Supplementary Table 5
Supplementary Table 5. Association between Insulin Resistance and Heart Failure using variants from the MAGIC GWAS (Lotta et al. Nat Genet 2017) and estimates from Wang (Diabetes Care 2017)
SNP	effect_allele	other_allele	eaf	beta.ir	se.ir	beta.hf	se.hf
rs17386142	C	T	0.92744	0.0224303	0.00400815	0.0083	0.0162
rs11577194	T	C	0.4789	0.0135133	0.00196299	0.0102	0.0078
rs9425291	A	G	0.4288	0.0149374	0.00199413	0.0221	0.008
rs4846565	G	A	0.6939	0.0162859	0.00208385	-0.001	0.0082
rs2249105	A	G	0.6227	0.0159435	0.00201374	0.0039	0.0081
rs492400	T	C	0.6029	0.0129584	0.00203774	-0.0024	0.0079
rs308971	G	A	0.1385	0.0236288	0.00291537	0.0074	0.0115
rs3864041	T	C	0.6227	0.0109316	0.00212383	0.0204	0.0081
rs9881942	A	G	0.4354	0.012712	0.00197336	-0.0154	0.0078
rs6822892	A	G	0.6464	0.0181506	0.00208385	-0.0118	0.0098
rs4976033	G	A	0.3799	0.0168678	0.00215357	0.02	0.0082
rs6887914	C	T	0.781	0.0143503	0.00246364	-0.002	0.0095
rs1045241	C	T	0.7427	0.0136755	0.00223379	0.0152	0.0088
rs2434612	G	A	0.2071	0.0168295	0.00248483	-0.0066	0.0097
rs966544	G	A	0.3074	0.0139473	0.00214223	-0.028	0.0084
rs12525532	T	C	0.3958	0.0148839	0.00203393	0.0037	0.0082
rs9492443	C	T	0.7639	0.0143917	0.00223379	-0.0167	0.0089
rs17169104	G	C	0.3417	0.0183302	0.00250369	0.0048	0.0086
rs4738141	G	A	0.2493	0.0173766	0.00249145	0.0012	0.0091
rs498313	A	G	0.6913	0.0122984	0.00212383	-0.0126	0.0085
rs11231693	A	G	0.06069	0.0315533	0.00423559	-0.0071	0.0178
rs17402950	G	A	0.05541	0.0311579	0.00580273	0.0162	0.0159
rs718314	G	A	0.2348	0.0160844	0.00226414	-0.0082	0.009
rs7323406	A	G	0.2784	0.0150323	0.00303812	0.0079	0.0087
rs7176058	A	G	0.8364	0.0148738	0.00263425	0.0178	0.0109
rs8032586	C	T	0.8813	0.0212975	0.00429989	0.0035	0.0134
rs754814	T	C	0.7309	0.0117416	0.00219418	0.0206	0.0088
rs6066149	G	A	0.7612	0.0138085	0.00226414	0.0001	0.0088
rs683135	A	G	0.2678	0.0190829	0.00216275	-0.0149	0.0085
rs10195252	T	C	0.5818	0.0271843	0.00205301	0.0024	0.008
rs2943645	T	C	0.6227	0.030591	0.00201374	0.0016	0.0082
rs295449	A	G	0.595	0.0144348	0.00230587	-0.0033	0.008
rs11130329	A	C	0.8641	0.0228473	0.00400104	-0.0164	0.0113
rs645040	T	G	0.7691	0.0250453	0.00239352	0.0228	0.0097
rs2699429	C	T	0.4063	0.0164798	0.00208385	0.0116	0.0081
rs3822072	A	G	0.4881	0.02126	0.00199413	0.0044	0.0079
rs4865796	A	G	0.7071	0.0158457	0.00212383	-0.0147	0.0084
rs459193	G	A	0.715	0.0221831	0.00223379	0.006	0.009
rs6937438	A	G	0.7084	0.0149774	0.00219418	-0.0026	0.0089
rs2745353	T	C	0.4789	0.0183932	0.00197336	-0.0122	0.0079
rs3861397	G	A	0.3417	0.0205698	0.00205301	-0.0019	0.0082
rs972283	G	A	0.5435	0.0228455	0.00212971	0.0258	0.008
rs2126259	T	C	0.09103	0.0442512	0.00315658	-0.0059	0.0135
rs1011685	C	T	0.8773	0.116163	0.00326565	0.0348	0.0134
rs7005992	C	G	0.1359	0.0179112	0.00286476	0.0075	0.0113
rs10995441	G	T	0.2361	0.0162727	0.00239498	-0.0092	0.0096
rs7973683	C	A	0.6385	0.0241561	0.00205301	0.0187	0.0083
rs7227237	C	T	0.7678	0.0178001	0.00321892	0.016	0.0095
rs8101064	T	C	0.04354	0.0565322	0.00816483	-0.0033	0.0238
rs4804833	A	G	0.4103	0.0177295	0.00212833	0.0121	0.0082
rs4804311	A	G	0.8905	0.0367298	0.00358621	0.0494	0.0145
rs731839	G	A	0.3417	0.0233359	0.0020912	-0.0044	0.0084
rs132985	C	T	0.5646	0.0175995	0.00194317	-0.0226	0.0079

## Sheet: Supplementary Table 6
Supplementary Table 6. Association between Fasting Insulin and Heart Failure
SNP	effect_allele	other_allele	beta.fi	se.fi	beta.hf	se.hf
rs1421085	C	T	0.019976	0.002511	0.0409	0.008
rs983309	T	G	0.028711	0.003791	-0.0075	0.0129
rs9884482	C	T	0.016492	0.002439	-0.0137	0.0081
rs7903146	C	T	0.018139	0.002771	-0.0033	0.0088
rs10195252	T	C	0.015888	0.002551	0.0024	0.008
rs1167800	A	G	0.015637	0.002624	0.0256	0.0081
rs2820436	C	A	0.015332	0.00261	0.0017	0.0083
rs2745353	T	C	0.01434	0.002457	-0.0122	0.0079
rs731839	G	A	0.014458	0.002563	-0.0044	0.0084
rs4865796	A	G	0.014576	0.002599	-0.0147	0.0084
rs2972143	G	A	0.014241	0.002572	0.0025	0.0082
rs1530559	A	G	0.014476	0.00262	0.0103	0.0092

## Sheet: Supplementary Table 7
Supplementary Table 7. Association between Fasting Glucose and Heart Failure
SNP	effect_allele	other_allele	beta.fg	se.fg	beta.hf	se.hf
rs10811661	T	C	0.02384	0.002757	-0.0322	0.0141
rs4869272	T	C	0.017677	0.002201	-0.0013	0.0112
rs11619319	G	A	0.019523	0.002441	-0.0199	0.0127
rs983309	T	G	0.025609	0.003282	-0.0194	0.0167
rs6943153	T	C	0.015358	0.002173	0.015	0.0113
rs11603334	G	A	0.019205	0.002826	-0.0027	0.0143
rs6113722	G	A	0.035313	0.005287	0.0139	0.0256
rs16913693	T	G	0.043415	0.00655	0.0084	0.0331
rs3829109	G	A	0.017249	0.002673	0.0155	0.0122
rs3783347	G	T	0.0168	0.002613	0.0108	0.0129
rs2302593	C	G	0.014358	0.002344	-0.0075	0.0107
rs9368222	A	C	0.014251	0.002331	-0.003	0.0116
rs10747083	A	G	0.013344	0.002308	0.0036	0.0121
rs6072275	A	G	0.015924	0.002819	0.001	0.0142
rs7651090	G	A	0.012838	0.002276	0.0226	0.0112
rs576674	G	A	0.016697	0.002984	-0.0104	0.0144
rs11715915	C	T	0.012043	0.002206	0.0202	0.0113

## Sheet: Supplementary Table 8
Supplementary Table 8. Association between Glycated Hemoglobin and Heart Failure
SNP	effect_allele	other_allele	beta	se	betahf	sehf
rs1046896	T	C	0.028	0.0017	-0.0091	0.0086
rs10774625	G	A	0.009	0.0016	-0.0426	0.008
rs10830963	G	C	0.02	0.002	0.0004	0.0086
rs11248914	T	C	0.014	0.0019	0.0021	0.0084
rs11558471	A	G	0.015	0.0017	0.0067	0.0085
rs11603334	G	A	0.012	0.0021	-0.0096	0.0106
rs11708067	A	G	0.013	0.0019	-0.0041	0.0095
rs11964178	A	G	0.01	0.0016	0.0066	0.0079
rs12621844	T	C	0.01	0.0018	-0.0118	0.008
rs13134327	A	G	0.013	0.0017	0.0052	0.0084
rs1558902	A	T	0.01	0.0019	0.043	0.008
rs17509001	C	T	0.018	0.0023	0.0204	0.0113
rs17533903	A	G	0.015	0.0022	-0.0185	0.0097
rs17747324	C	T	0.015	0.0023	0.0069	0.0095
rs198846	G	A	0.022	0.0022	-0.0099	0.0113
rs2110073	T	C	0.015	0.0028	-0.0032	0.0134
rs2383208	A	G	0.014	0.0021	-0.0202	0.0104
rs267738	T	G	0.011	0.0019	-0.0052	0.0095
rs282587	G	A	0.019	0.0027	0.0098	0.0119
rs3782123	C	A	0.013	0.002	0.017	0.009
rs4607517	A	G	0.031	0.0024	0.0202	0.0107
rs4737009	A	G	0.021	0.002	-0.013	0.0094
rs4745982	T	G	0.095	0.0056	0.0023	0.0152
rs4820268	G	A	0.016	0.0017	0.0037	0.008
rs560887	C	T	0.028	0.0018	0.0142	0.0086
rs579459	C	T	0.011	0.0019	0.0556	0.0098
rs592423	A	C	0.009	0.0017	0.0038	0.0078
rs6474359	T	C	0.044	0.0053	-0.0225	0.0218
rs6980507	A	G	0.01	0.0018	-0.0058	0.008
rs7040409	C	G	0.028	0.0037	-0.0053	0.0163
rs7616006	A	G	0.01	0.00017	-0.0031	0.0081
rs7756992	G	A	0.012	0.0018	0.0007	0.0089
rs8192675	T	C	0.011	0.0017	-0.0042	0.0086
rs837763	T	C	0.017	0.0016	-0.0041	0.008
rs857691	T	C	0.019	0.0019	-0.0042	0.0092
rs9604573	T	C	0.01	0.0018	-0.0005	0.0009
rs9818758	A	G	0.012	0.002	-0.0173	0.0102
rs9914988	A	G	0.013	0.002	0.0079	0.0098

## Sheet: Supplementary Table 9
Supplementary Table 9. Association between Heart Failure and Type 2 Diabetes
SNP	effect_allele	other_allele	beta.hf	se.hf	beta.t2d	se.t2d
rs660240	C	T	0.0611	0.0097	-0.022	0.0077
rs17042102	A	G	0.1103	0.0121	0.0064	0.01
rs11745324	G	A	0.0528	0.0095	0.021	0.0075
rs4135240	T	C	0.0486	0.0084	0.022	0.0067
rs55730499	T	C	0.1058	0.0157	0.019	0.013
rs140570886	C	T	0.2136	0.0328	0.0025	0.028
rs1556516	C	G	0.0622	0.0078	0.029	0.0063
rs600038	C	T	0.0569	0.0096	0.044	0.0079
rs4746140	G	C	0.0666	0.0109	0.02	0.0089
rs17617337	C	T	0.0561	0.0095	0.0088	0.0072
rs4766578	T	A	0.0433	0.0079	0.022	0.0065
rs56094641	G	A	0.0454	0.008	0.12	0.0064

## Sheet: Supplementary Table 10
Supplementary Table 10. Leave-one-out MR analysis of association between T2D and HF using DIAMANTE variants.
exposure	outcome	samplesize	SNP	beta	se	p value
T2D	HF	952914	rs10048404	0.118202	0.0136737	5.40424e-18
T2D	HF	952914	rs10096633	0.117813	0.0136255	5.30831e-18
T2D	HF	952914	rs10101067	0.118734	0.0136672	3.70545e-18
T2D	HF	952914	rs10119430	0.11826	0.0136699	5.09899e-18
T2D	HF	952914	rs10159026	0.118007	0.0136553	5.52997e-18
T2D	HF	952914	rs10184004	0.119082	0.0137082	3.72532e-18
T2D	HF	952914	rs10188334	0.117211	0.0136409	8.50331e-18
T2D	HF	952914	rs10262104	0.118786	0.0136668	3.57465e-18
T2D	HF	952914	rs10404726	0.117512	0.0136082	5.8535e-18
T2D	HF	952914	rs10408163	0.118049	0.0136673	5.75248e-18
T2D	HF	952914	rs10440833	0.119832	0.0137674	3.20175e-18
T2D	HF	952914	rs10469860	0.118393	0.0136726	4.75499e-18
T2D	HF	952914	rs10737818	0.118556	0.0136809	4.48305e-18
T2D	HF	952914	rs10750397	0.118663	0.0136819	4.21062e-18
T2D	HF	952914	rs1075855	0.118431	0.0136739	4.67146e-18
T2D	HF	952914	rs10758950	0.118202	0.0136635	5.10705e-18
T2D	HF	952914	rs10766076	0.117907	0.0136439	5.53792e-18
T2D	HF	952914	rs10767659	0.118292	0.0136721	5.05605e-18
T2D	HF	952914	rs10773000	0.119121	0.0136636	2.828e-18
T2D	HF	952914	rs10806906	0.118272	0.0136696	5.05122e-18
T2D	HF	952914	rs10808671	0.118287	0.0136812	5.33572e-18
T2D	HF	952914	rs10811661	0.123894	0.0136997	1.51714e-19
T2D	HF	952914	rs10818763	0.118545	0.0136751	4.3719e-18
T2D	HF	952914	rs10830963	0.119229	0.013707	3.36588e-18
T2D	HF	952914	rs10835690	0.118916	0.0136516	3.01717e-18
T2D	HF	952914	rs10844519	0.118623	0.0136758	4.17428e-18
T2D	HF	952914	rs10879261	0.11843	0.013681	4.86326e-18
T2D	HF	952914	rs10889560	0.117946	0.0136434	5.38419e-18
T2D	HF	952914	rs10916780	0.118334	0.013675	5.00258e-18
T2D	HF	952914	rs10937721	0.11762	0.0137219	1.02012e-17
T2D	HF	952914	rs10938398	0.11623	0.0135695	1.07567e-17
T2D	HF	952914	rs10993072	0.118538	0.0136781	4.4649e-18
T2D	HF	952914	rs10998338	0.119031	0.0136657	3.03356e-18
T2D	HF	952914	rs11046164	0.118191	0.0136696	5.31849e-18
T2D	HF	952914	rs11048457	0.119104	0.0136667	2.90996e-18
T2D	HF	952914	rs11078916	0.117937	0.0136612	5.97906e-18
T2D	HF	952914	rs1109442	0.118007	0.0136508	5.39529e-18
T2D	HF	952914	rs11096542	0.118494	0.0136755	4.52559e-18
T2D	HF	952914	rs11108094	0.118707	0.013675	3.93784e-18
T2D	HF	952914	rs11114650	0.118437	0.0136688	4.52337e-18
T2D	HF	952914	rs1111875	0.119801	0.0137524	3.005e-18
T2D	HF	952914	rs111283203	0.11891	0.013652	3.03664e-18
T2D	HF	952914	rs11150745	0.117588	0.0136333	6.40534e-18
T2D	HF	952914	rs11155073	0.118359	0.0136756	4.94058e-18
T2D	HF	952914	rs11159347	0.118827	0.0136659	3.46417e-18
T2D	HF	952914	rs11173646	0.118217	0.0136663	5.1376e-18
T2D	HF	952914	rs111765639	0.118219	0.0136618	5.00489e-18
T2D	HF	952914	rs11181613	0.118604	0.0136767	4.24627e-18
T2D	HF	952914	rs11199116	0.118174	0.0136683	5.34016e-18
T2D	HF	952914	rs11201992	0.117793	0.0136408	5.85795e-18
T2D	HF	952914	rs112324411	0.118773	0.0136765	3.80389e-18
T2D	HF	952914	rs11236524	0.118671	0.0136648	3.80709e-18
T2D	HF	952914	rs11240351	0.118425	0.0136752	4.72252e-18
T2D	HF	952914	rs112515915	0.118331	0.0136758	5.03564e-18
T2D	HF	952914	rs11257655	0.119231	0.0137311	3.84598e-18
T2D	HF	952914	rs11258422	0.118796	0.0136677	3.56951e-18
T2D	HF	952914	rs1127215	0.118701	0.0136853	4.1877e-18
T2D	HF	952914	rs113135335	0.118861	0.0136755	3.57703e-18
T2D	HF	952914	rs113414093	0.118565	0.0136775	4.37597e-18
T2D	HF	952914	rs114136102	0.118719	0.0136726	3.85477e-18
T2D	HF	952914	rs11561066	0.117518	0.0136098	5.8823e-18
T2D	HF	952914	rs11583755	0.118458	0.0136822	4.80881e-18
T2D	HF	952914	rs11602873	0.120828	0.0136839	1.04726e-18
T2D	HF	952914	rs11614914	0.118625	0.0136829	4.33793e-18
T2D	HF	952914	rs11616380	0.119197	0.0137157	3.60723e-18
T2D	HF	952914	rs11646052	0.118543	0.0136755	4.38663e-18
T2D	HF	952914	rs11651755	0.119134	0.0137104	3.64566e-18
T2D	HF	952914	rs116861182	0.117965	0.0136611	5.8682e-18
T2D	HF	952914	rs11708067	0.119686	0.0137025	2.44472e-18
T2D	HF	952914	rs117316450	0.119328	0.0136551	2.3569e-18
T2D	HF	952914	rs11759026	0.119186	0.0136859	3.07352e-18
T2D	HF	952914	rs117642733	0.118421	0.0136754	4.74108e-18
T2D	HF	952914	rs11830241	0.118667	0.013671	3.95085e-18
T2D	HF	952914	rs11848361	0.118364	0.0136748	4.90007e-18
T2D	HF	952914	rs11858759	0.118727	0.0136689	3.7567e-18
T2D	HF	952914	rs11870735	0.118129	0.0136643	5.37473e-18
T2D	HF	952914	rs11913442	0.117886	0.0136452	5.65048e-18
T2D	HF	952914	rs11929640	0.118547	0.0136733	4.32332e-18
T2D	HF	952914	rs11994255	0.118461	0.0136735	4.57436e-18
T2D	HF	952914	rs11998023	0.118648	0.0136741	4.07077e-18
T2D	HF	952914	rs12001437	0.118865	0.0136711	3.47965e-18
T2D	HF	952914	rs12041243	0.118695	0.0136716	3.89184e-18
T2D	HF	952914	rs12056338	0.118824	0.0136674	3.50174e-18
T2D	HF	952914	rs12116935	0.118726	0.0136707	3.79723e-18
T2D	HF	952914	rs12128213	0.118278	0.0136721	5.10232e-18
T2D	HF	952914	rs12140153	0.118439	0.0136757	4.69551e-18
T2D	HF	952914	rs12151653	0.119156	0.0136442	2.47802e-18
T2D	HF	952914	rs12185519	0.118006	0.0136647	5.83033e-18
T2D	HF	952914	rs12187734	0.118973	0.013666	3.15455e-18
T2D	HF	952914	rs12192275	0.118741	0.0136851	4.07681e-18
T2D	HF	952914	rs12380322	0.118984	0.0136655	3.12311e-18
T2D	HF	952914	rs12419690	0.118346	0.0136773	5.02664e-18
T2D	HF	952914	rs12422600	0.118223	0.0136683	5.17496e-18
T2D	HF	952914	rs12433335	0.117712	0.013612	5.25707e-18
T2D	HF	952914	rs12454712	0.11819	0.0136825	5.71984e-18
T2D	HF	952914	rs12494424	0.117786	0.0136401	5.85968e-18
T2D	HF	952914	rs12505942	0.117691	0.0136407	6.24585e-18
T2D	HF	952914	rs12539264	0.118674	0.0136743	4.00506e-18
T2D	HF	952914	rs1260326	0.119997	0.0136816	1.77568e-18
T2D	HF	952914	rs12603589	0.117995	0.0136702	6.05271e-18
T2D	HF	952914	rs12625671	0.118877	0.0136793	3.6143e-18
T2D	HF	952914	rs12667919	0.118572	0.0136734	4.25642e-18
T2D	HF	952914	rs12669521	0.118401	0.0136746	4.78024e-18
T2D	HF	952914	rs12680217	0.118228	0.0136628	5.00177e-18
T2D	HF	952914	rs12746673	0.118601	0.0136753	4.21974e-18
T2D	HF	952914	rs12789028	0.119238	0.0136624	2.60423e-18
T2D	HF	952914	rs12825669	0.11842	0.0136732	4.6885e-18
T2D	HF	952914	rs12856169	0.118938	0.0136713	3.32305e-18
T2D	HF	952914	rs12883788	0.118206	0.0136765	5.47691e-18
T2D	HF	952914	rs12892257	0.118611	0.0136767	4.22736e-18
T2D	HF	952914	rs12910361	0.117881	0.0137068	7.96091e-18
T2D	HF	952914	rs12918782	0.118736	0.0136694	3.74477e-18
T2D	HF	952914	rs12932337	0.118332	0.0136741	4.98581e-18
T2D	HF	952914	rs12986742	0.117644	0.0136557	6.99045e-18
T2D	HF	952914	rs12992995	0.118669	0.0136727	3.98388e-18
T2D	HF	952914	rs13059382	0.118126	0.0136558	5.13642e-18
T2D	HF	952914	rs13094957	0.119592	0.0136808	2.29744e-18
T2D	HF	952914	rs13099581	0.117988	0.0136589	5.70941e-18
T2D	HF	952914	rs13107325	0.117478	0.0135767	5.01879e-18
T2D	HF	952914	rs13237518	0.118205	0.0136687	5.24656e-18
T2D	HF	952914	rs13238568	0.117838	0.0136403	5.67357e-18
T2D	HF	952914	rs13262861	0.11964	0.0137012	2.49997e-18
T2D	HF	952914	rs13266634	0.119426	0.0137617	4.02445e-18
T2D	HF	952914	rs13268508	0.118961	0.0136756	3.35486e-18
T2D	HF	952914	rs1327123	0.118536	0.0136746	4.38444e-18
T2D	HF	952914	rs13288108	0.1186	0.0136726	4.1624e-18
T2D	HF	952914	rs13330163	0.118505	0.0136735	4.44642e-18
T2D	HF	952914	rs13365225	0.118684	0.0136725	3.94e-18
T2D	HF	952914	rs13406280	0.118746	0.0136731	3.80029e-18
T2D	HF	952914	rs13415288	0.118126	0.0136652	5.41604e-18
T2D	HF	952914	rs13434089	0.118912	0.0136818	3.58433e-18
T2D	HF	952914	rs138771	0.118608	0.0136723	4.13239e-18
T2D	HF	952914	rs1408579	0.117938	0.0136594	5.91485e-18
T2D	HF	952914	rs1412234	0.117618	0.0136595	7.2619e-18
T2D	HF	952914	rs1421085	0.113586	0.013737	1.35491e-16
T2D	HF	952914	rs142385484	0.118649	0.0136735	4.05116e-18
T2D	HF	952914	rs1426371	0.119411	0.0136569	2.25654e-18
T2D	HF	952914	rs1431819	0.118432	0.0136763	4.73153e-18
T2D	HF	952914	rs144052331	0.118363	0.0136745	4.89756e-18
T2D	HF	952914	rs145904381	0.119167	0.0136663	2.78798e-18
T2D	HF	952914	rs146716733	0.11828	0.013668	4.982e-18
T2D	HF	952914	rs1470560	0.117915	0.0136479	5.63104e-18
T2D	HF	952914	rs148106383	0.118297	0.0136728	5.06131e-18
T2D	HF	952914	rs149027146	0.117592	0.0136509	7.04019e-18
T2D	HF	952914	rs149336329	0.118932	0.0136755	3.41622e-18
T2D	HF	952914	rs152839	0.118372	0.0136762	4.91585e-18
T2D	HF	952914	rs1561927	0.119016	0.0136639	3.03205e-18
T2D	HF	952914	rs1567353	0.118444	0.0136758	4.6833e-18
T2D	HF	952914	rs1570247	0.119434	0.0136097	1.69939e-18
T2D	HF	952914	rs1650505	0.118941	0.013672	3.33097e-18
T2D	HF	952914	rs1662185	0.118537	0.0136733	4.35034e-18
T2D	HF	952914	rs16881572	0.118587	0.0136732	4.21217e-18
T2D	HF	952914	rs16907058	0.118355	0.0136713	4.83419e-18
T2D	HF	952914	rs17035289	0.118842	0.0136693	3.49673e-18
T2D	HF	952914	rs17036160	0.118677	0.0137162	5.0434e-18
T2D	HF	952914	rs17265513	0.118765	0.0136717	3.72416e-18
T2D	HF	952914	rs17439448	0.11834	0.0136736	4.94589e-18
T2D	HF	952914	rs174541	0.11783	0.0136489	5.98039e-18
T2D	HF	952914	rs17662402	0.118885	0.0136715	3.44461e-18
T2D	HF	952914	rs177045	0.118462	0.0136786	4.70098e-18
T2D	HF	952914	rs17747955	0.118771	0.013668	3.63164e-18
T2D	HF	952914	rs17772814	0.119131	0.0136652	2.83596e-18
T2D	HF	952914	rs17810376	0.118243	0.013672	5.21768e-18
T2D	HF	952914	rs1801645	0.118454	0.0136792	4.74204e-18
T2D	HF	952914	rs1812707	0.118392	0.0136732	4.77277e-18
T2D	HF	952914	rs1815591	0.118439	0.0136783	4.76283e-18
T2D	HF	952914	rs187653072	0.119171	0.01366	2.68358e-18
T2D	HF	952914	rs1877712	0.118646	0.0136714	4.01447e-18
T2D	HF	952914	rs1885234	0.119009	0.0136558	2.90867e-18
T2D	HF	952914	rs1922879	0.118914	0.0136586	3.14288e-18
T2D	HF	952914	rs1929883	0.117804	0.0136471	6.02011e-18
T2D	HF	952914	rs197374	0.118643	0.0136722	4.03954e-18
T2D	HF	952914	rs1996617	0.11794	0.0136556	5.78443e-18
T2D	HF	952914	rs2031847	0.11896	0.0136518	2.93818e-18
T2D	HF	952914	rs2032217	0.118089	0.0136622	5.45344e-18
T2D	HF	952914	rs2040792	0.118439	0.0136786	4.76942e-18
T2D	HF	952914	rs2056857	0.118771	0.0136705	3.6861e-18
T2D	HF	952914	rs2066827	0.11813	0.0136664	5.43417e-18
T2D	HF	952914	rs2115107	0.118081	0.0136747	5.87291e-18
T2D	HF	952914	rs2125799	0.11833	0.0136719	4.92869e-18
T2D	HF	952914	rs2150999	0.118016	0.013656	5.51983e-18
T2D	HF	952914	rs2169033	0.118368	0.0136774	4.9611e-18
T2D	HF	952914	rs217256	0.118575	0.0136731	4.24036e-18
T2D	HF	952914	rs2188848	0.118251	0.0136715	5.17529e-18
T2D	HF	952914	rs2216063	0.118476	0.0136722	4.49422e-18
T2D	HF	952914	rs2237897	0.118393	0.0137528	7.39582e-18
T2D	HF	952914	rs2240716	0.118639	0.0136737	4.083e-18
T2D	HF	952914	rs2252115	0.118439	0.0136745	4.66153e-18
T2D	HF	952914	rs2255703	0.118355	0.0136739	4.90405e-18
T2D	HF	952914	rs2257883	0.119687	0.0136659	1.98578e-18
T2D	HF	952914	rs2269247	0.118844	0.0136703	3.51055e-18
T2D	HF	952914	rs2272163	0.118015	0.0136542	5.46962e-18
T2D	HF	952914	rs2277339	0.118968	0.0136615	3.08483e-18
T2D	HF	952914	rs2280141	0.118834	0.0136884	3.91082e-18
T2D	HF	952914	rs2282456	0.118905	0.0136737	3.44065e-18
T2D	HF	952914	rs2289739	0.118292	0.0136803	5.2907e-18
T2D	HF	952914	rs2290203	0.118548	0.0136864	4.64833e-18
T2D	HF	952914	rs2394186	0.118387	0.0136715	4.74158e-18
T2D	HF	952914	rs2408252	0.118872	0.0136674	3.39306e-18
T2D	HF	952914	rs2409742	0.118218	0.0136769	5.44584e-18
T2D	HF	952914	rs242105	0.117883	0.0136685	6.44167e-18
T2D	HF	952914	rs243513	0.11845	0.0136732	4.59975e-18
T2D	HF	952914	rs244415	0.117195	0.0136384	8.47171e-18
T2D	HF	952914	rs2447198	0.118563	0.0136725	4.26023e-18
T2D	HF	952914	rs2453051	0.118558	0.0136833	4.53571e-18
T2D	HF	952914	rs247975	0.117989	0.0136574	5.66163e-18
T2D	HF	952914	rs2482506	0.118623	0.0136763	4.18532e-18
T2D	HF	952914	rs2513505	0.118809	0.0136676	3.53717e-18
T2D	HF	952914	rs2591392	0.118222	0.0136744	5.35416e-18
T2D	HF	952914	rs2605281	0.118072	0.0136633	5.54582e-18
T2D	HF	952914	rs2608953	0.118296	0.0136737	5.09033e-18
T2D	HF	952914	rs2613499	0.118202	0.0136724	5.36712e-18
T2D	HF	952914	rs261967	0.11764	0.0136144	5.5802e-18
T2D	HF	952914	rs2633311	0.117604	0.0136104	5.58698e-18
T2D	HF	952914	rs2662390	0.118406	0.0136724	4.70838e-18
T2D	HF	952914	rs2679745	0.118467	0.0136737	4.56016e-18
T2D	HF	952914	rs2723065	0.118457	0.0136872	4.9477e-18
T2D	HF	952914	rs2725370	0.118115	0.0136706	5.61459e-18
T2D	HF	952914	rs2730827	0.118128	0.0136695	5.53528e-18
T2D	HF	952914	rs2780215	0.11882	0.0136437	3.07042e-18
T2D	HF	952914	rs2796441	0.12014	0.0136724	1.53592e-18
T2D	HF	952914	rs2816177	0.118426	0.0136735	4.67752e-18
T2D	HF	952914	rs2820446	0.1187	0.0136828	4.13087e-18
T2D	HF	952914	rs28408270	0.118842	0.0136662	3.4362e-18
T2D	HF	952914	rs28490139	0.119048	0.0136586	2.88251e-18
T2D	HF	952914	rs28642213	0.118037	0.0137144	7.51771e-18
T2D	HF	952914	rs2867570	0.11832	0.0136736	5.00834e-18
T2D	HF	952914	rs28712435	0.118239	0.0136712	5.20507e-18
T2D	HF	952914	rs2872246	0.118462	0.0136764	4.64609e-18
T2D	HF	952914	rs28758542	0.118863	0.013663	3.32902e-18
T2D	HF	952914	rs2876354	0.117997	0.0136873	6.64012e-18
T2D	HF	952914	rs28792187	0.118542	0.0136734	4.33836e-18
T2D	HF	952914	rs28819812	0.11888	0.0136666	3.36173e-18
T2D	HF	952914	rs2913873	0.118187	0.0136665	5.2421e-18
T2D	HF	952914	rs2943650	0.119263	0.0137305	3.75553e-18
T2D	HF	952914	rs2952858	0.118444	0.0136734	4.6198e-18
T2D	HF	952914	rs2956092	0.118219	0.0136686	5.19688e-18
T2D	HF	952914	rs3012060	0.117984	0.013649	5.42313e-18
T2D	HF	952914	rs3020781	0.118501	0.0136762	4.5242e-18
T2D	HF	952914	rs302395	0.118366	0.0136726	4.83636e-18
T2D	HF	952914	rs303760	0.117083	0.0135926	7.07456e-18
T2D	HF	952914	rs305686	0.118762	0.0136727	3.75282e-18
T2D	HF	952914	rs3122231	0.118446	0.0136755	4.66779e-18
T2D	HF	952914	rs3130283	0.119096	0.0136791	3.13664e-18
T2D	HF	952914	rs3130931	0.119603	0.0136598	2.02535e-18
T2D	HF	952914	rs314879	0.1183	0.0136758	5.13661e-18
T2D	HF	952914	rs329118	0.118307	0.013675	5.09251e-18
T2D	HF	952914	rs33959228	0.118628	0.0136749	4.14064e-18
T2D	HF	952914	rs340874	0.118604	0.0136993	4.81472e-18
T2D	HF	952914	rs34247110	0.118439	0.0136788	4.77492e-18
T2D	HF	952914	rs34298980	0.118161	0.0136759	5.61766e-18
T2D	HF	952914	rs34329895	0.118943	0.0136618	3.141e-18
T2D	HF	952914	rs34506349	0.118564	0.0136757	4.33207e-18
T2D	HF	952914	rs34584161	0.118729	0.0136929	4.28962e-18
T2D	HF	952914	rs34617913	0.118726	0.0136671	3.72057e-18
T2D	HF	952914	rs348330	0.117933	0.0136862	6.87584e-18
T2D	HF	952914	rs34845373	0.118058	0.0136681	5.74662e-18
T2D	HF	952914	rs35011184	0.125523	0.014106	5.6574e-19
T2D	HF	952914	rs35164294	0.118202	0.0136703	5.30326e-18
T2D	HF	952914	rs35251247	0.117601	0.0136311	6.27349e-18
T2D	HF	952914	rs35753840	0.118243	0.0136704	5.17068e-18
T2D	HF	952914	rs35895680	0.116968	0.0136411	9.93489e-18
T2D	HF	952914	rs35901985	0.118462	0.0136744	4.59215e-18
T2D	HF	952914	rs36062478	0.11901	0.013661	2.99454e-18
T2D	HF	952914	rs36111056	0.11863	0.0136723	4.07428e-18
T2D	HF	952914	rs362307	0.118333	0.0136741	4.9796e-18
T2D	HF	952914	rs366577	0.118391	0.0136713	4.72478e-18
T2D	HF	952914	rs3735491	0.11825	0.0136683	5.08691e-18
T2D	HF	952914	rs3744347	0.118963	0.0136603	3.07373e-18
T2D	HF	952914	rs3747207	0.119125	0.013667	2.87545e-18
T2D	HF	952914	rs3751239	0.118418	0.0137001	5.44762e-18
T2D	HF	952914	rs3753693	0.118418	0.013675	4.74264e-18
T2D	HF	952914	rs3755879	0.118785	0.0136701	3.64234e-18
T2D	HF	952914	rs379417	0.119179	0.0136416	2.40584e-18
T2D	HF	952914	rs3798519	0.117762	0.0136662	6.87484e-18
T2D	HF	952914	rs3802219	0.118565	0.0136822	4.49148e-18
T2D	HF	952914	rs3816605	0.118211	0.0136754	5.42643e-18
T2D	HF	952914	rs38221	0.118907	0.0136635	3.2458e-18
T2D	HF	952914	rs3828242	0.118779	0.0136681	3.61721e-18
T2D	HF	952914	rs3845843	0.117964	0.0136583	5.78077e-18
T2D	HF	952914	rs3872707	0.118005	0.0136582	5.62634e-18
T2D	HF	952914	rs3887059	0.118065	0.0136636	5.58225e-18
T2D	HF	952914	rs3887925	0.119379	0.0136645	2.40684e-18
T2D	HF	952914	rs3918298	0.117812	0.0136563	6.29997e-18
T2D	HF	952914	rs410150	0.1177	0.0136239	5.65977e-18
T2D	HF	952914	rs4129858	0.11843	0.0136736	4.66687e-18
T2D	HF	952914	rs41304257	0.118688	0.0136756	3.99911e-18
T2D	HF	952914	rs4252505	0.118117	0.0136593	5.27092e-18
T2D	HF	952914	rs429358	0.117788	0.0136735	7.03825e-18
T2D	HF	952914	rs4294149	0.118475	0.0136736	4.53631e-18
T2D	HF	952914	rs4335	0.119175	0.0136479	2.49884e-18
T2D	HF	952914	rs4343858	0.118325	0.0136725	4.96203e-18
T2D	HF	952914	rs4382480	0.118746	0.013675	3.84004e-18
T2D	HF	952914	rs4384608	0.118524	0.0136761	4.45581e-18
T2D	HF	952914	rs4397977	0.118084	0.0136653	5.56552e-18
T2D	HF	952914	rs4440243	0.118537	0.0136751	4.39603e-18
T2D	HF	952914	rs4463416	0.118252	0.013667	5.04193e-18
T2D	HF	952914	rs4479849	0.118756	0.013671	3.73139e-18
T2D	HF	952914	rs4482463	0.118379	0.0136696	4.7173e-18
T2D	HF	952914	rs464605	0.118734	0.0137093	4.6842e-18
T2D	HF	952914	rs4655617	0.118396	0.013675	4.80862e-18
T2D	HF	952914	rs4658234	0.118836	0.0136675	3.47624e-18
T2D	HF	952914	rs4671799	0.118174	0.0136674	5.31202e-18
T2D	HF	952914	rs4673712	0.118767	0.0136707	3.69661e-18
T2D	HF	952914	rs4709746	0.118695	0.0136828	4.14642e-18
T2D	HF	952914	rs4777857	0.118545	0.0136748	4.36494e-18
T2D	HF	952914	rs4788815	0.118851	0.0136627	3.3498e-18
T2D	HF	952914	rs4805881	0.118798	0.0136792	3.80071e-18
T2D	HF	952914	rs4807125	0.118871	0.0136611	3.27717e-18
T2D	HF	952914	rs4809906	0.118057	0.013673	5.90824e-18
T2D	HF	952914	rs4810145	0.118187	0.0136741	5.46902e-18
T2D	HF	952914	rs4820323	0.119125	0.0136358	2.411e-18
T2D	HF	952914	rs4832290	0.117643	0.013607	5.34471e-18
T2D	HF	952914	rs4833687	0.118466	0.013675	4.59443e-18
T2D	HF	952914	rs4834232	0.118568	0.013674	4.28051e-18
T2D	HF	952914	rs4865796	0.119853	0.0136507	1.6343e-18
T2D	HF	952914	rs4902002	0.118364	0.0136724	4.83819e-18
T2D	HF	952914	rs4906272	0.11783	0.0136333	5.48763e-18
T2D	HF	952914	rs4923864	0.118699	0.0136752	3.96288e-18
T2D	HF	952914	rs4929965	0.119032	0.0137111	3.90691e-18
T2D	HF	952914	rs4930726	0.117802	0.0136606	6.49668e-18
T2D	HF	952914	rs4942883	0.118526	0.0136733	4.38026e-18
T2D	HF	952914	rs4976033	0.117886	0.013646	5.67763e-18
T2D	HF	952914	rs5010712	0.118789	0.0136658	3.54708e-18
T2D	HF	952914	rs501470	0.118795	0.0136759	3.74042e-18
T2D	HF	952914	rs506597	0.118229	0.0136712	5.23835e-18
T2D	HF	952914	rs510062	0.1187	0.0136703	3.85231e-18
T2D	HF	952914	rs524903	0.117821	0.0136581	6.32772e-18
T2D	HF	952914	rs529565	0.116424	0.0135578	8.91008e-18
T2D	HF	952914	rs529623	0.118876	0.0136617	3.27712e-18
T2D	HF	952914	rs539515	0.118713	0.0136753	3.92782e-18
T2D	HF	952914	rs55691245	0.118619	0.0136848	4.39908e-18
T2D	HF	952914	rs55812705	0.118807	0.0136699	3.58855e-18
T2D	HF	952914	rs55857387	0.118817	0.0136771	3.70993e-18
T2D	HF	952914	rs56243018	0.11891	0.0136764	3.48231e-18
T2D	HF	952914	rs56281442	0.118936	0.0136609	3.13883e-18
T2D	HF	952914	rs56337234	0.120187	0.0136066	1.01878e-18
T2D	HF	952914	rs56348580	0.118311	0.0136917	5.56739e-18
T2D	HF	952914	rs56365443	0.117901	0.0136419	5.49618e-18
T2D	HF	952914	rs56392746	0.118577	0.0136797	4.39512e-18
T2D	HF	952914	rs56799554	0.117962	0.0136532	5.62622e-18
T2D	HF	952914	rs56823429	0.119169	0.013671	2.85921e-18
T2D	HF	952914	rs57286125	0.119444	0.013673	2.42079e-18
T2D	HF	952914	rs5762925	0.117553	0.0136133	5.86234e-18
T2D	HF	952914	rs57767539	0.118874	0.0136697	3.43244e-18
T2D	HF	952914	rs58090211	0.118509	0.0136695	4.3367e-18
T2D	HF	952914	rs583769	0.118705	0.013674	3.91895e-18
T2D	HF	952914	rs58542926	0.119936	0.0136181	1.28426e-18
T2D	HF	952914	rs59020573	0.118506	0.0136725	4.41999e-18
T2D	HF	952914	rs59489841	0.118354	0.0136713	4.83909e-18
T2D	HF	952914	rs59646751	0.118183	0.0136651	5.21541e-18
T2D	HF	952914	rs6011155	0.118089	0.0136661	5.57361e-18
T2D	HF	952914	rs6021276	0.118337	0.0136751	4.99609e-18
T2D	HF	952914	rs60251368	0.118496	0.0136767	4.5532e-18
T2D	HF	952914	rs60384372	0.11836	0.0136806	5.07522e-18
T2D	HF	952914	rs6059662	0.118846	0.0136772	3.64661e-18
T2D	HF	952914	rs6066138	0.11879	0.0136813	3.86596e-18
T2D	HF	952914	rs6073143	0.118202	0.0136696	5.28424e-18
T2D	HF	952914	rs6137042	0.118795	0.0136653	3.52452e-18
T2D	HF	952914	rs61579137	0.118179	0.0136646	5.21507e-18
T2D	HF	952914	rs61736066	0.118034	0.0136555	5.44061e-18
T2D	HF	952914	rs61779284	0.119519	0.0136928	2.57723e-18
T2D	HF	952914	rs61817176	0.118339	0.0136747	4.97776e-18
T2D	HF	952914	rs61967710	0.118308	0.0136682	4.90026e-18
T2D	HF	952914	rs620191	0.118852	0.013661	3.3155e-18
T2D	HF	952914	rs62182438	0.118042	0.0136573	5.4661e-18
T2D	HF	952914	rs62255926	0.118033	0.0136556	5.44834e-18
T2D	HF	952914	rs62262091	0.117911	0.0136636	6.1579e-18
T2D	HF	952914	rs62271373	0.118123	0.0136688	5.53176e-18
T2D	HF	952914	rs62452060	0.11848	0.0136745	4.54318e-18
T2D	HF	952914	rs62490267	0.118184	0.0136718	5.41323e-18
T2D	HF	952914	rs62492368	0.119627	0.013608	1.48321e-18
T2D	HF	952914	rs62618693	0.118678	0.0136781	4.08308e-18
T2D	HF	952914	rs6479591	0.118112	0.013658	5.2474e-18
T2D	HF	952914	rs6495182	0.118604	0.0136807	4.34267e-18
T2D	HF	952914	rs6538805	0.118609	0.0136775	4.25242e-18
T2D	HF	952914	rs654629	0.118262	0.0136724	5.16421e-18
T2D	HF	952914	rs6549112	0.118708	0.0136728	3.88562e-18
T2D	HF	952914	rs6558173	0.118816	0.0136668	3.50507e-18
T2D	HF	952914	rs6561273	0.119099	0.0136585	2.78801e-18
T2D	HF	952914	rs6565922	0.118574	0.0136766	4.32642e-18
T2D	HF	952914	rs6567160	0.116926	0.0136381	1.00407e-17
T2D	HF	952914	rs6597649	0.118242	0.0136688	5.12795e-18
T2D	HF	952914	rs667920	0.118211	0.0136713	5.30418e-18
T2D	HF	952914	rs66815886	0.118422	0.0136826	4.933e-18
T2D	HF	952914	rs6710938	0.11814	0.0136705	5.52633e-18
T2D	HF	952914	rs6712905	0.11762	0.0136171	5.73755e-18
T2D	HF	952914	rs6714523	0.118453	0.0136759	4.66006e-18
T2D	HF	952914	rs6715901	0.118756	0.0136689	3.6874e-18
T2D	HF	952914	rs6716394	0.119	0.0136622	3.03361e-18
T2D	HF	952914	rs67269808	0.119521	0.0136494	2.01413e-18
T2D	HF	952914	rs6741676	0.118467	0.0136789	4.69286e-18
T2D	HF	952914	rs676387	0.118893	0.0136792	3.57619e-18
T2D	HF	952914	rs6766859	0.117777	0.0136437	6.01394e-18
T2D	HF	952914	rs6777684	0.117551	0.0136862	8.77037e-18
T2D	HF	952914	rs6792892	0.117874	0.0136606	6.20523e-18
T2D	HF	952914	rs6813195	0.119055	0.0136775	3.19197e-18
T2D	HF	952914	rs6835992	0.11866	0.0136748	4.05415e-18
T2D	HF	952914	rs6870983	0.118391	0.0136739	4.79414e-18
T2D	HF	952914	rs6885157	0.118708	0.0136707	3.841e-18
T2D	HF	952914	rs6897117	0.118724	0.0136692	3.77007e-18
T2D	HF	952914	rs6946660	0.117709	0.0136764	7.51615e-18
T2D	HF	952914	rs6956980	0.118713	0.0136752	3.92619e-18
T2D	HF	952914	rs6972291	0.118103	0.0136575	5.26634e-18
T2D	HF	952914	rs697239	0.118018	0.0137035	7.16282e-18
T2D	HF	952914	rs6975279	0.118418	0.0136841	4.98835e-18
T2D	HF	952914	rs6976111	0.118449	0.0136731	4.59965e-18
T2D	HF	952914	rs6978327	0.117932	0.0136478	5.5679e-18
T2D	HF	952914	rs7029718	0.11792	0.0136557	5.8613e-18
T2D	HF	952914	rs705145	0.118282	0.0136699	5.03051e-18
T2D	HF	952914	rs7071036	0.11857	0.0136702	4.18755e-18
T2D	HF	952914	rs712315	0.118346	0.0136708	4.84995e-18
T2D	HF	952914	rs7127212	0.117741	0.0136226	5.47158e-18
T2D	HF	952914	rs7130522	0.118622	0.0136717	4.08207e-18
T2D	HF	952914	rs7132908	0.117295	0.0135999	6.42765e-18
T2D	HF	952914	rs7134150	0.117941	0.0136436	5.40814e-18
T2D	HF	952914	rs7147483	0.119317	0.0136505	2.3139e-18
T2D	HF	952914	rs71495046	0.118668	0.0136717	3.96448e-18
T2D	HF	952914	rs7156625	0.117679	0.0136739	7.55839e-18
T2D	HF	952914	rs7163757	0.117678	0.0136721	7.48729e-18
T2D	HF	952914	rs7169799	0.118962	0.0136527	2.94693e-18
T2D	HF	952914	rs7178762	0.117765	0.0136566	6.50587e-18
T2D	HF	952914	rs7224711	0.117182	0.0135983	6.85044e-18
T2D	HF	952914	rs7227272	0.118121	0.013663	5.3646e-18
T2D	HF	952914	rs723355	0.11792	0.0136478	5.61056e-18
T2D	HF	952914	rs7240767	0.119166	0.0136618	2.72096e-18
T2D	HF	952914	rs7246440	0.118481	0.0136753	4.56215e-18
T2D	HF	952914	rs72692804	0.118681	0.0136756	4.01723e-18
T2D	HF	952914	rs7274134	0.118412	0.0136728	4.70038e-18
T2D	HF	952914	rs727734	0.118312	0.0136731	5.02043e-18
T2D	HF	952914	rs72802365	0.11744	0.0136858	9.39585e-18
T2D	HF	952914	rs72803684	0.118957	0.0136623	3.12089e-18
T2D	HF	952914	rs72846863	0.118328	0.0136722	4.9437e-18
T2D	HF	952914	rs72926932	0.120184	0.0136116	1.05072e-18
T2D	HF	952914	rs730497	0.117915	0.0136767	6.60165e-18
T2D	HF	952914	rs730831	0.118751	0.0136784	3.90144e-18
T2D	HF	952914	rs73121277	0.118514	0.0136746	4.44624e-18
T2D	HF	952914	rs73146095	0.118098	0.0136644	5.48903e-18
T2D	HF	952914	rs7316626	0.117828	0.013638	5.63924e-18
T2D	HF	952914	rs73167517	0.118993	0.0136552	2.93049e-18
T2D	HF	952914	rs73184014	0.11791	0.0136485	5.6673e-18
T2D	HF	952914	rs73221116	0.118202	0.013683	5.69224e-18
T2D	HF	952914	rs73642097	0.118566	0.0136728	4.25984e-18
T2D	HF	952914	rs74677818	0.118386	0.0136732	4.79242e-18
T2D	HF	952914	rs7483027	0.117983	0.0136583	5.70917e-18
T2D	HF	952914	rs75080135	0.119618	0.0136118	1.52446e-18
T2D	HF	952914	rs75253922	0.118806	0.0136751	3.69627e-18
T2D	HF	952914	rs75307421	0.118556	0.0136719	4.2653e-18
T2D	HF	952914	rs7538321	0.118329	0.0136695	4.86731e-18
T2D	HF	952914	rs75432112	0.118161	0.0136995	6.39492e-18
T2D	HF	952914	rs7546252	0.117741	0.0136383	5.97258e-18
T2D	HF	952914	rs7554251	0.119422	0.0136216	1.83232e-18
T2D	HF	952914	rs75619936	0.118063	0.0136507	5.20153e-18
T2D	HF	952914	rs757110	0.118085	0.0137019	6.80548e-18
T2D	HF	952914	rs76263492	0.117918	0.0136547	5.83339e-18
T2D	HF	952914	rs7629	0.117442	0.0136271	6.79709e-18
T2D	HF	952914	rs7633673	0.118557	0.0136781	4.41086e-18
T2D	HF	952914	rs7645613	0.118368	0.0136731	4.84466e-18
T2D	HF	952914	rs7659468	0.1189	0.0136694	3.37018e-18
T2D	HF	952914	rs7664347	0.118518	0.0136743	4.42845e-18
T2D	HF	952914	rs76675804	0.119803	0.013706	2.31183e-18
T2D	HF	952914	rs7674402	0.118753	0.0136651	3.61685e-18
T2D	HF	952914	rs76789970	0.118821	0.0136664	3.48722e-18
T2D	HF	952914	rs76895963	0.1219	0.0137179	6.32356e-19
T2D	HF	952914	rs7732130	0.117894	0.0136892	7.1677e-18
T2D	HF	952914	rs7742292	0.118529	0.0136758	4.43391e-18
T2D	HF	952914	rs77424687	0.117717	0.0136149	5.32451e-18
T2D	HF	952914	rs7752666	0.119182	0.0136491	2.50534e-18
T2D	HF	952914	rs7758002	0.119022	0.0136674	3.08099e-18
T2D	HF	952914	rs7758115	0.118611	0.0136737	4.1584e-18
T2D	HF	952914	rs7787720	0.119308	0.0136404	2.19746e-18
T2D	HF	952914	rs7895872	0.118646	0.013675	4.0943e-18
T2D	HF	952914	rs79090772	0.11829	0.0136856	5.45595e-18
T2D	HF	952914	rs79310463	0.118446	0.0136817	4.83269e-18
T2D	HF	952914	rs7941510	0.119094	0.0136639	2.88329e-18
T2D	HF	952914	rs79598313	0.118348	0.0136736	4.92028e-18
T2D	HF	952914	rs7970687	0.118036	0.0136617	5.6225e-18
T2D	HF	952914	rs7991679	0.118426	0.0136714	4.6217e-18
T2D	HF	952914	rs8010382	0.118449	0.0136741	4.62538e-18
T2D	HF	952914	rs80196932	0.118543	0.0136813	4.53102e-18
T2D	HF	952914	rs8043085	0.118008	0.0136715	6.04398e-18
T2D	HF	952914	rs8054556	0.117979	0.0136679	6.03832e-18
T2D	HF	952914	rs8056890	0.118068	0.0136669	5.6752e-18
T2D	HF	952914	rs8061528	0.118553	0.0136767	4.38906e-18
T2D	HF	952914	rs8071043	0.118688	0.0136883	4.29277e-18
T2D	HF	952914	rs8107527	0.120634	0.0136131	7.8834e-19
T2D	HF	952914	rs8188241	0.118522	0.0136738	4.40403e-18
T2D	HF	952914	rs8192675	0.119069	0.0136788	3.1857e-18
T2D	HF	952914	rs827237	0.118463	0.0136746	4.59738e-18
T2D	HF	952914	rs838720	0.118991	0.0136708	3.20236e-18
T2D	HF	952914	rs853866	0.118028	0.0136577	5.52928e-18
T2D	HF	952914	rs858519	0.118583	0.0136742	4.24501e-18
T2D	HF	952914	rs860262	0.120873	0.0136889	1.04644e-18
T2D	HF	952914	rs884847	0.118631	0.0136734	4.0973e-18
T2D	HF	952914	rs893617	0.120176	0.0136414	1.25576e-18
T2D	HF	952914	rs917195	0.118498	0.013682	4.68126e-18
T2D	HF	952914	rs924753	0.118311	0.0136736	5.03621e-18
T2D	HF	952914	rs9308614	0.119378	0.0136648	2.41103e-18
T2D	HF	952914	rs9316500	0.118474	0.0136829	4.7787e-18
T2D	HF	952914	rs9319943	0.118152	0.0136665	5.36249e-18
T2D	HF	952914	rs9358912	0.118609	0.0136732	4.15331e-18
T2D	HF	952914	rs9370243	0.117638	0.0136012	5.18955e-18
T2D	HF	952914	rs9379084	0.118918	0.0136859	3.65299e-18
T2D	HF	952914	rs9384	0.119535	0.0136545	2.05428e-18
T2D	HF	952914	rs9390022	0.11858	0.013678	4.3436e-18
T2D	HF	952914	rs9411425	0.118536	0.0136726	4.33684e-18
T2D	HF	952914	rs9438610	0.118328	0.0136724	4.95052e-18
T2D	HF	952914	rs9449295	0.117709	0.0136133	5.30769e-18
T2D	HF	952914	rs945187	0.119013	0.0136663	3.07978e-18
T2D	HF	952914	rs9472139	0.118455	0.0136814	4.79617e-18
T2D	HF	952914	rs9479	0.118265	0.0136735	5.18595e-18
T2D	HF	952914	rs9515905	0.118581	0.0136869	4.56255e-18
T2D	HF	952914	rs9560114	0.118321	0.0136715	4.94668e-18
T2D	HF	952914	rs9564268	0.118092	0.0136619	5.43178e-18
T2D	HF	952914	rs9568868	0.117562	0.0136052	5.57397e-18
T2D	HF	952914	rs9587811	0.117729	0.0136318	5.80604e-18
T2D	HF	952914	rs978444	0.118435	0.013674	4.66376e-18
T2D	HF	952914	rs9814945	0.118087	0.013667	5.60539e-18
T2D	HF	952914	rs9857204	0.118696	0.013673	3.91998e-18
T2D	HF	952914	rs9859406	0.116776	0.0137754	2.30898e-17
T2D	HF	952914	rs9869477	0.118451	0.0136741	4.62041e-18
T2D	HF	952914	rs9872347	0.119436	0.0136346	1.95682e-18
T2D	HF	952914	rs9873519	0.119229	0.0136674	2.69461e-18
T2D	HF	952914	rs9913225	0.118085	0.0136643	5.53056e-18
T2D	HF	952914	rs9927842	0.118381	0.0136717	4.76794e-18
T2D	HF	952914	rs993380	0.118219	0.0136703	5.24771e-18
T2D	HF	952914	rs9937296	0.118093	0.0136669	5.58283e-18
T2D	HF	952914	rs9958640	0.118504	0.0136732	4.43925e-18
T2D	HF	952914	rs9991328	0.118551	0.0136741	4.33064e-18
T2D	HF	952914	All	0.118502	0.0136559	4.03766e-18

## Sheet: Supplementary Table 11
Supplementary Table 11. Full Multivariable MR Results for Association of Traits with Incident HF.
Inverse-Variance Weighted Estimate
	T2D only		T2D+CHD		T2D+SBP		T2D+BMI		T2D+LDL-C		Full Model (T2D+CHD+BMI+LDL-C)
	Odds Ratio (95% CI)	p value	Odds Ratio (95% CI)	p value	Odds Ratio (95% CI)	p value	Odds Ratio (95% CI)	p value	Odds Ratio (95% CI)	p value	Odds Ratio (95% CI)	p value
T2D (per 1 log-unit increased risk of T2D)	1.06 (1.03-1.09)	<0.001	1.04 (1.01-1.07)	0.004	1.05 (1.02-1.07)	<0.001	1.06 (1.03-1.09)	<0.001	1.06 (1.02-1.09)	0.001	1.03 (1.00-1.06)	0.038
CHD (per 1 log-unit increased risk of CHD)			1.19 (1.14-1.24)	<0.001							1.18 (1.13-1.23)	<0.001
SBP (per 1mmHg increase)					1.02 (1.01-1.02)	<0.001					1.01 (1.01-1.02)	<0.001
BMI (per SD increase)							1.55 (1.42-1.70)	<0.001			1.50 (1.37-1.65)	<0.001
LDL-C (per SD increase)									1.15 (1.08-1.23)	<0.001	1.05 (0.99-1.12)	0.1
MR-Egger Estimate
	T2D only		T2D+CHD		T2D+SBP		T2D+BMI		T2D+LDL-C		Full Model (T2D+CHD+BMI+LDL-C)
	Odds Ratio (95% CI)	p value	Odds Ratio (95% CI)	p value	Odds Ratio (95% CI)	p value	Odds Ratio (95% CI)	p value	Odds Ratio (95% CI)	p value	Odds Ratio (95% CI)	p value
T2D (per 1 log-unit increased risk of T2D)	0.99 (0.94-1.04)	0.62	0.98 (0.94-1.03)	0.4	1.02 (0.99-1.06)	0.2	1.03 (0.98-1.07)	0.22	0.98 (0.93-1.03)	0.44	1.02 (0.98-1.06)	0.33
CHD (per 1 log-unit increased risk of CHD)			1.17 (1.12-1.22)	<0.001							1.07 (1.12-1.22)	<0.001
SBP (per 1mmHg increase)					1.02 (1.01-1.02)	<0.001					1.01 (1.01-1.02)	<0.001
BMI (per SD increase)							1.47 (1.32-1.64)	<0.001			1.47 (1.33-1.63)	<0.001
LDL-C (per SD increase)									1.18 (1.11-1.25)	<0.001	1.06 (0.99-1.13)	0.09
intercept (beta)	0.005 (0.001-0.009)	<0.001	0.005 (0.002-0.008)	0.002	0.002 (0.000-0.003)	0.041	0.003 (0.000-0.006)	0.09	0.007 (0.003-0.010)	<0.001	0.001 (-0.001-0.003)	0.29
T2D - type 2 diabetes; CHD - coronary heart disease; SBP - systolic blood pressure; BMI - body mass index; LDL-C - low density lipoprotein cholesterol; CI - confidence interval; SD - standard deviation
